# Supplementary material for: Rare earth metal bisamido complexes with an NNO tridentate ligand and catalytic activity for the selective polymerization of isoprene
Source: Royal Society of Chemistry journal article supplement (doi:10.1039/c7nj01454f), 2017-01-01
Supplement: c7nj01454f1.pdf [file c7nj01454f1.pdf]

## Electronic Supplementary Information (ESI) for *NJC*

### Rare earth metal bisamido complexes with a NNO tridentate ligand and catalytic activity for selective polymerization of isoprene

Xiaoxia Gu,<sup>a,b</sup> Shaowu Wang,<sup>\*a,c</sup> Yun Wei,<sup>a</sup> Xiancui Zhu,<sup>a</sup> Shuangliu Zhou,<sup>a</sup> Zeming Huang,<sup>a</sup> and Xiaolong Mu<sup>a</sup>

<sup>a</sup> Key Laboratory of Functional Molecular Solids, Ministry of Education, Anhui Laboratory of Molecule-Based Materials, College of Chemistry and Materials Science, Anhui Normal University, Wuhu, Anhui 241000, China. E-mail: swwang@mail.ahnu.edu.cn, Fax: +86-553-3883517; Tel: +86-553-5910015.

<sup>b</sup> Department of Chemistry, Wannan Medical College, Wuhu, Anhui 241002, China.

<sup>c</sup> State Key Laboratory of Organometallic Chemistry, Shanghai Institute of Organic Chemistry, Shanghai 200032, China.

### Table of Contents

|                                                                                                       |    |
|-------------------------------------------------------------------------------------------------------|----|
| 1. Crystallographic data of complexes <b>2-8</b> .....                                                | S2 |
| 2. Copies of <sup>1</sup> H NMR, <sup>13</sup> C NMR spectra of compounds ( <b>1, 2, 4</b> )....      | S3 |
| 3. Molecular structures of the complexes <b>2-8</b> .....                                             | S5 |
| 4. Copies of <sup>1</sup> H NMR, <sup>13</sup> C NMR and <sup>13</sup> C-int NMR spectra of PIP ..... | S6 |

## 1. Crystallographic data of complexes 2-8

Table S1. Summary of crystal and refinement data for complexes 2-5.

| Complexes                                                              | 2                                                                | 3                                                                 | 4                                                                 | 5                                                                 |
|------------------------------------------------------------------------|------------------------------------------------------------------|-------------------------------------------------------------------|-------------------------------------------------------------------|-------------------------------------------------------------------|
| empirical formula                                                      | C <sub>24</sub> H <sub>51</sub> YN <sub>4</sub> OSi <sub>4</sub> | C <sub>24</sub> H <sub>51</sub> NdN <sub>4</sub> OSi <sub>4</sub> | C <sub>24</sub> H <sub>51</sub> SmN <sub>4</sub> OSi <sub>4</sub> | C <sub>24</sub> H <sub>51</sub> GdN <sub>4</sub> OSi <sub>4</sub> |
| fw                                                                     | 612.96                                                           | 668.29                                                            | 674.40                                                            | 681.30                                                            |
| <i>T</i> (K)                                                           | 293(2)                                                           | 293(2)                                                            | 293(2)                                                            | 293(2)                                                            |
| wavelength (Å)                                                         | 0.71073                                                          | 0.71073                                                           | 0.71073                                                           | 0.71073                                                           |
| cryst system                                                           | Monoclinic                                                       | Monoclinic                                                        | Monoclinic                                                        | Monoclinic                                                        |
| space group                                                            | <i>P</i> 2 <sub>1</sub> / <i>n</i>                               | <i>P</i> 2 <sub>1</sub> / <i>n</i>                                | <i>P</i> 2 <sub>1</sub> / <i>n</i>                                | <i>P</i> 2/ <i>c</i>                                              |
| <i>a</i> (Å)                                                           | 10.9219(10)                                                      | 12.7474(13)                                                       | 12.7324(9)                                                        | 16.8027(16)                                                       |
| <i>b</i> (Å)                                                           | 18.9450(17)                                                      | 16.9894(18)                                                       | 16.9061(11)                                                       | 12.4348(12)                                                       |
| <i>c</i> (Å)                                                           | 16.7845(15)                                                      | 16.8809(18)                                                       | 16.9308(12)                                                       | 17.2821(16)                                                       |
| $\alpha$ (deg)                                                         | 90                                                               | 90                                                                | 90                                                                | 90                                                                |
| $\beta$ (deg)                                                          | 93.9550(10)                                                      | 102.8170(10)                                                      | 102.4170(10)                                                      | 101.2840(10)                                                      |
| $\gamma$ (deg)                                                         | 90                                                               | 90                                                                | 90                                                                | 90                                                                |
| <i>V</i> (Å <sup>3</sup> )                                             | 3464.7(5)                                                        | 3564.8(6)                                                         | 3559.2(4)                                                         | 3541.1(6)                                                         |
| <i>Z</i>                                                               | 4                                                                | 4                                                                 | 4                                                                 | 4                                                                 |
| <i>D</i> <sub>calcd</sub> (g cm <sup>-3</sup> )                        | 1.175                                                            | 1.245                                                             | 1.259                                                             | 1.278                                                             |
| abs coeff (mm <sup>-1</sup> )                                          | 1.842                                                            | 2.561                                                             | 1.805                                                             | 2.029                                                             |
| <i>F</i> (000)                                                         | 1304                                                             | 1388                                                              | 1396                                                              | 1404                                                              |
| $\theta$ range for data                                                | 1.62 to 27.58                                                    | 1.72 to 27.58                                                     | 1.72 to 27.55                                                     | 1.64 to 27.68                                                     |
| collcn(deg)                                                            |                                                                  |                                                                   |                                                                   |                                                                   |
| no. of                                                                 | 29751/8003                                                       | 30310/8219                                                        | 39955/8088                                                        | 30173/8247                                                        |
| reflenscolld/unique                                                    |                                                                  |                                                                   |                                                                   |                                                                   |
| data/restns/params                                                     | 8003/0/321                                                       | 8219/0/321                                                        | 8088/94/322                                                       | 8247/66/352                                                       |
| goof                                                                   | 1.001                                                            | 1.039                                                             | 0.996                                                             | 1.095                                                             |
| R <sub>1</sub> , wR <sub>2</sub> [ <i>I</i> > 2 $\sigma$ ( <i>I</i> )] | 0.0449, 0.0859                                                   | 0.0418, 0.1077                                                    | 0.0569, 0.2187                                                    | 0.0268, 0.0625                                                    |
| R <sub>1</sub> , wR <sub>2</sub> (all data)                            | 0.0989, 0.1022                                                   | 0.0522, 0.1159                                                    | 0.0651, 0.2503                                                    | 0.0366, 0.0664                                                    |
| largest diff                                                           | 0.293, -0.397                                                    | 2.405, -1.364                                                     | 3.569, -2.204                                                     | 0.325, -1.127                                                     |
| peak/hole (e Å <sup>-3</sup> )                                         |                                                                  |                                                                   |                                                                   |                                                                   |

Table S2. Summary of crystal and refinement data for complexes 6-8.

| Complexes         | 6                                                                 | 7                                                                 | 8                                                                 |
|-------------------|-------------------------------------------------------------------|-------------------------------------------------------------------|-------------------------------------------------------------------|
| empirical formula | C <sub>24</sub> H <sub>51</sub> DyN <sub>4</sub> OSi <sub>4</sub> | C <sub>24</sub> H <sub>51</sub> ErN <sub>4</sub> OSi <sub>4</sub> | C <sub>24</sub> H <sub>51</sub> N <sub>4</sub> YbOSi <sub>4</sub> |
| fw                | 686.55                                                            | 691.31                                                            | 697.09                                                            |
| <i>T</i> (K)      | 293(2)                                                            | 293(2)                                                            | 293(2)                                                            |
| wavelength (Å)    | 0.71073                                                           | 0.71073                                                           | 0.71073                                                           |
| cryst system      | Orthorhombic                                                      | Orthorhombic                                                      | Orthorhombic                                                      |
| space group       | <i>P</i> 2 <sub>1</sub> 2 <sub>1</sub> 2 <sub>1</sub>             | <i>P</i> 2 <sub>1</sub> 2 <sub>1</sub> 2 <sub>1</sub>             | <i>P</i> 2 <sub>1</sub> 2 <sub>1</sub> 2 <sub>1</sub>             |
| <i>a</i> (Å)      | 9.5148(9)                                                         | 9.5144(8)                                                         | 9.4869(7)                                                         |
| <i>b</i> (Å)      | 19.1828(18)                                                       | 19.1019(16)                                                       | 19.0170(14)                                                       |

|                                                |                |                |                |
|------------------------------------------------|----------------|----------------|----------------|
| $c$ (Å)                                        | 19.1886(18)    | 19.2125(16)    | 19.2467(14)    |
| $\alpha$ (deg)                                 | 90             | 90             | 90             |
| $\beta$ (deg)                                  | 90             | 90             | 90             |
| $\gamma$ (deg)                                 | 90             | 90             | 90             |
| $V$ (Å <sup>3</sup> )                          | 3502.3(6)      | 3491.7(5)      | 3472.3(4)      |
| $Z$                                            | 4              | 4              | 4              |
| $D_{\text{calcd}}$ (g cm <sup>-3</sup> )       | 1.302          | 1.315          | 1.333          |
| abs coeff (mm <sup>-1</sup> )                  | 2.291          | 2.561          | 2.852          |
| $F$ (000)                                      | 1412           | 1420           | 1428           |
| $\theta$ range for data                        | 1.50 to 27.45  | 2.12 to 27.78  | 1.51 to 27.76  |
| collcn(deg)                                    |                |                |                |
| no. of                                         | 40169/7936     | 30315/8146     | 30602/8104     |
| reflenscollcd/unique                           |                |                |                |
| data/restns/params                             | 7936/0/321     | 8146/0/322     | 8104/0/322     |
| goof                                           | 1.079          | 1.023          | 1.027          |
| $R_1, wR_2 [I > 2\sigma(I)]$                   | 0.0439, 0.1110 | 0.0259, 0.0578 | 0.0610, 0.1452 |
| $R_1, wR_2$ (all data)                         | 0.0471, 0.1139 | 0.0306, 0.0598 | 0.0662, 0.1511 |
| largest diff peak/hole<br>(e Å <sup>-3</sup> ) | 1.311, -1.374  | 0.860, -0.745  | 3.404, -1.071  |

## 2. Copies of <sup>1</sup>H NMR, <sup>13</sup>C NMR spectra of complexes 2 and 4.

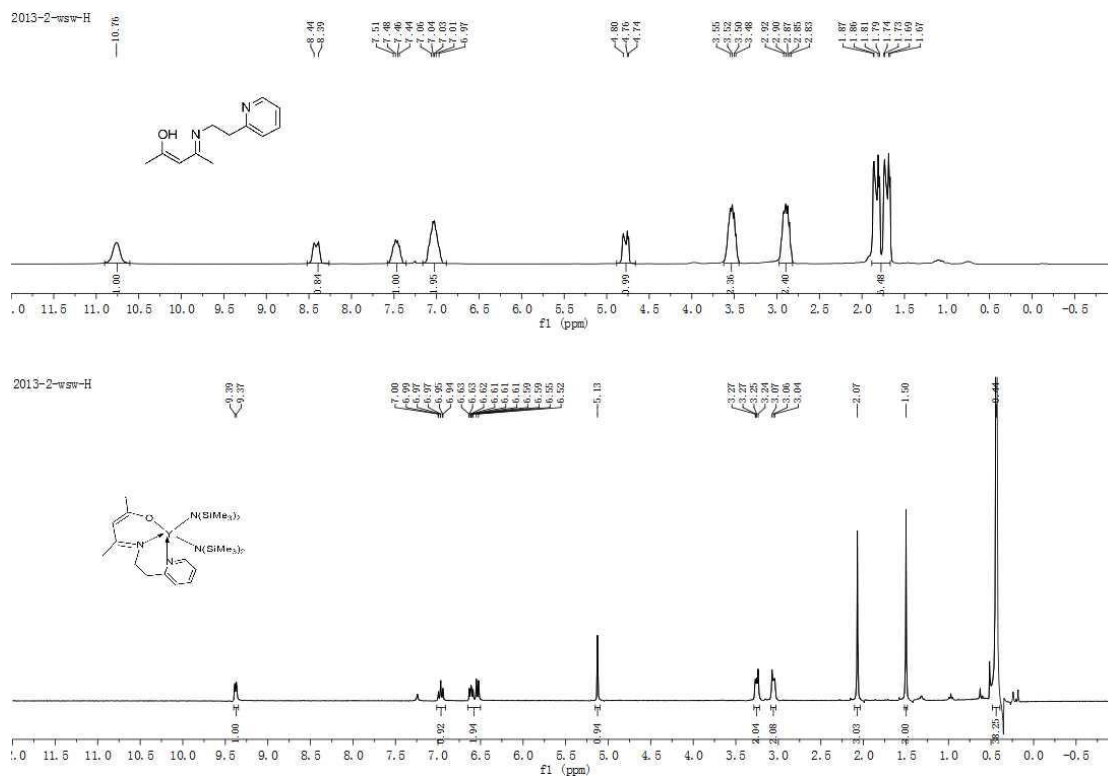

**Fig. S1.** <sup>1</sup>H NMR spectra (500 MHz, C<sub>6</sub>D<sub>6</sub>, 298 K) of complex 2 and the ligand precursor.

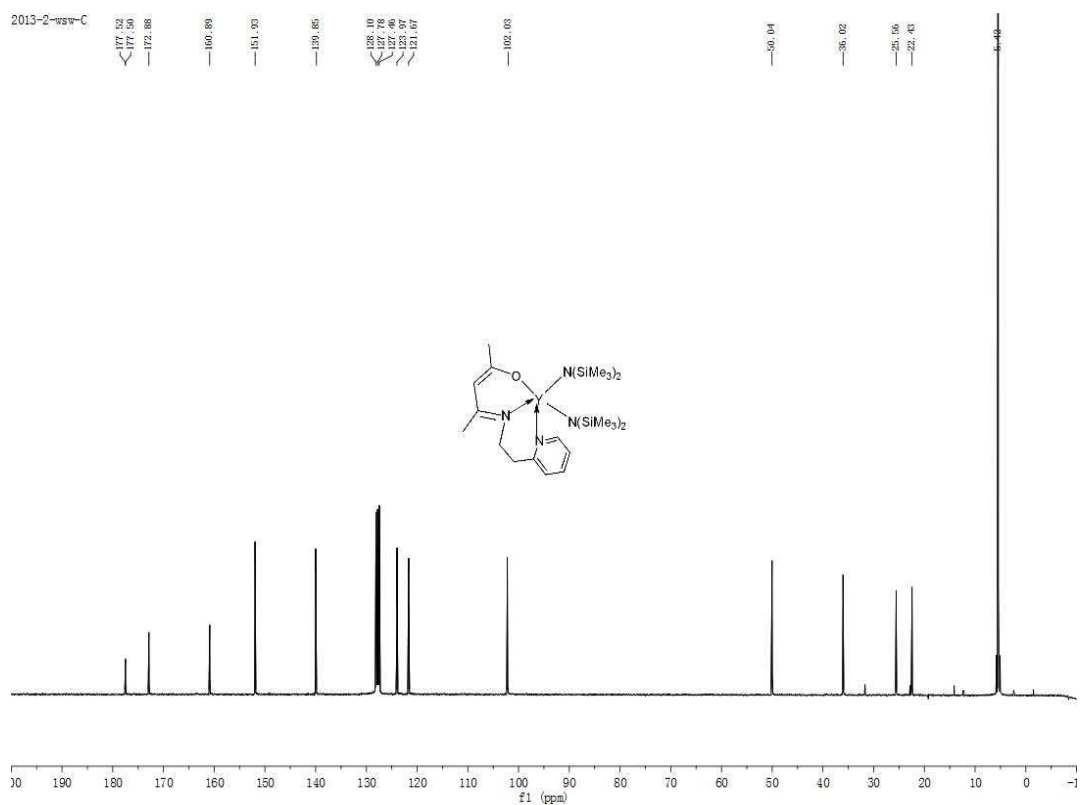

**Fig. S2.**  $^{13}\text{C}$  NMR spectrum (126 MHz,  $\text{C}_6\text{D}_6$ , 298 K) of complex **2**.

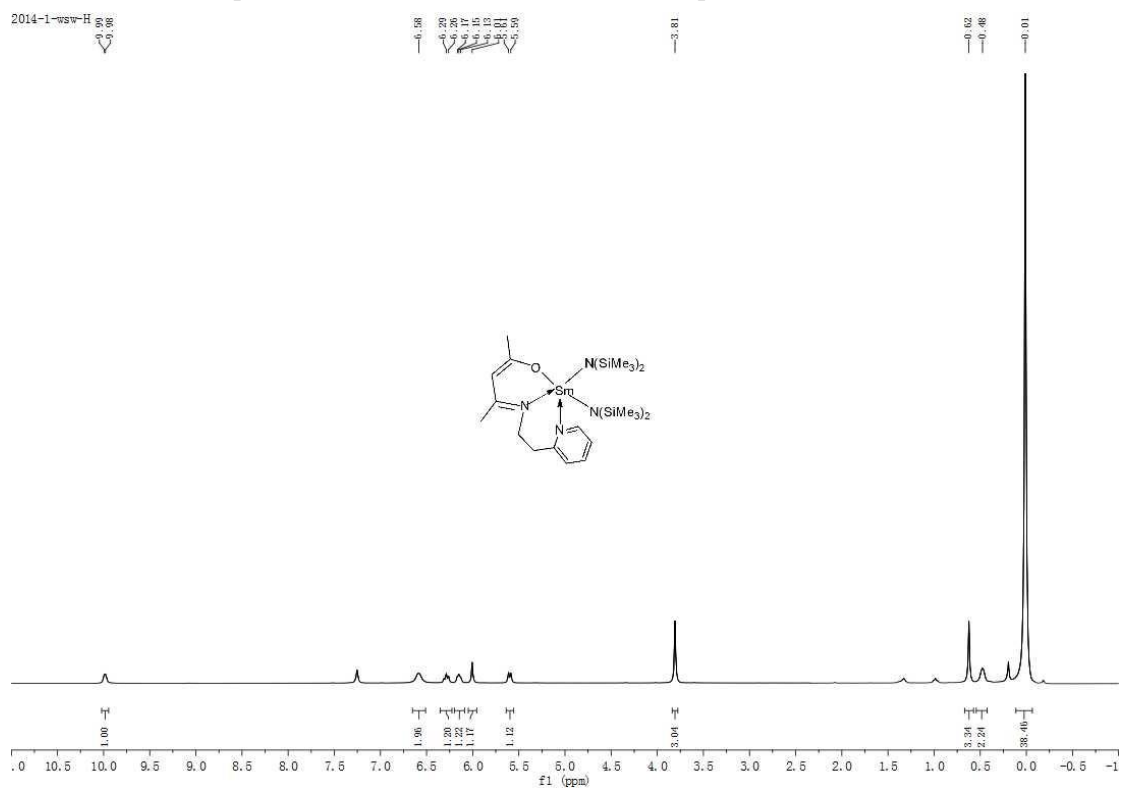

**Fig. S3.**  $^1\text{H}$  NMR spectrum (500 MHz,  $\text{C}_6\text{D}_6$ , 298 K) of complex **4**.

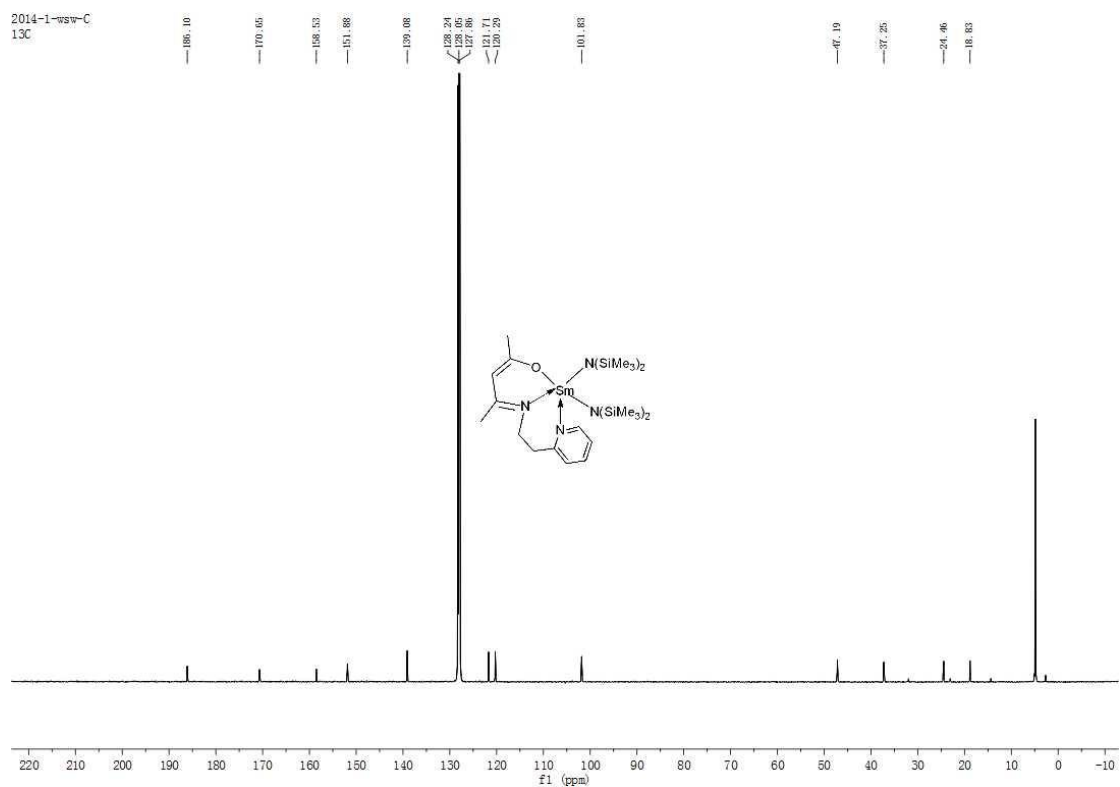

**Fig. S4.**  $^{13}\text{C}$  NMR spectrum (126 MHz,  $\text{C}_6\text{D}_6$ , 298 K) of complex **4**.

### 3. Molecular structures of the complexes 2-8.

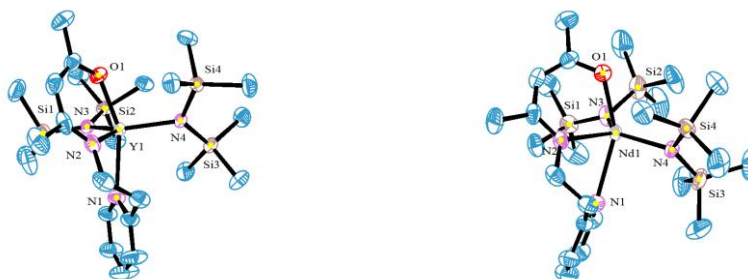

**Fig. S5.** Crystal structure of complexes **2-3** (Ellipsoids at 30% probability level). Hydrogen atoms were omitted for clarity.

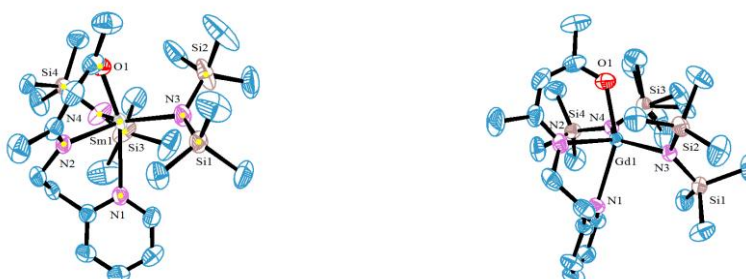

**Fig. S6.** Crystal structure of complexes **4-5** (Ellipsoids at 30% probability level). Hydrogen atoms were omitted for clarity.

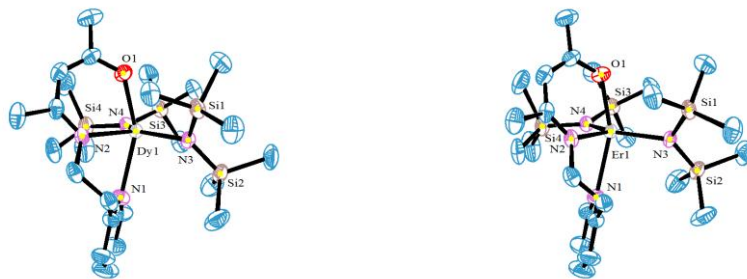

**Fig. S7.** Crystal structure of complexes **6-7** (Ellipsoids at 30% probability level). Hydrogen atoms were omitted for clarity.

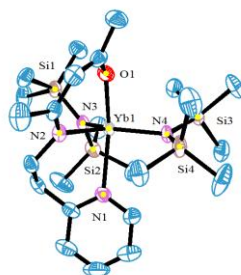

**Fig. S8.** Crystal structure of complex **8** (Ellipsoids at 30% probability level). Hydrogen atoms were omitted for clarity.

#### 4. Copies of $^1\text{H}$ NMR, $^{13}\text{C}$ NMR and $^{13}\text{C}$ -int NMR spectra of PIP.

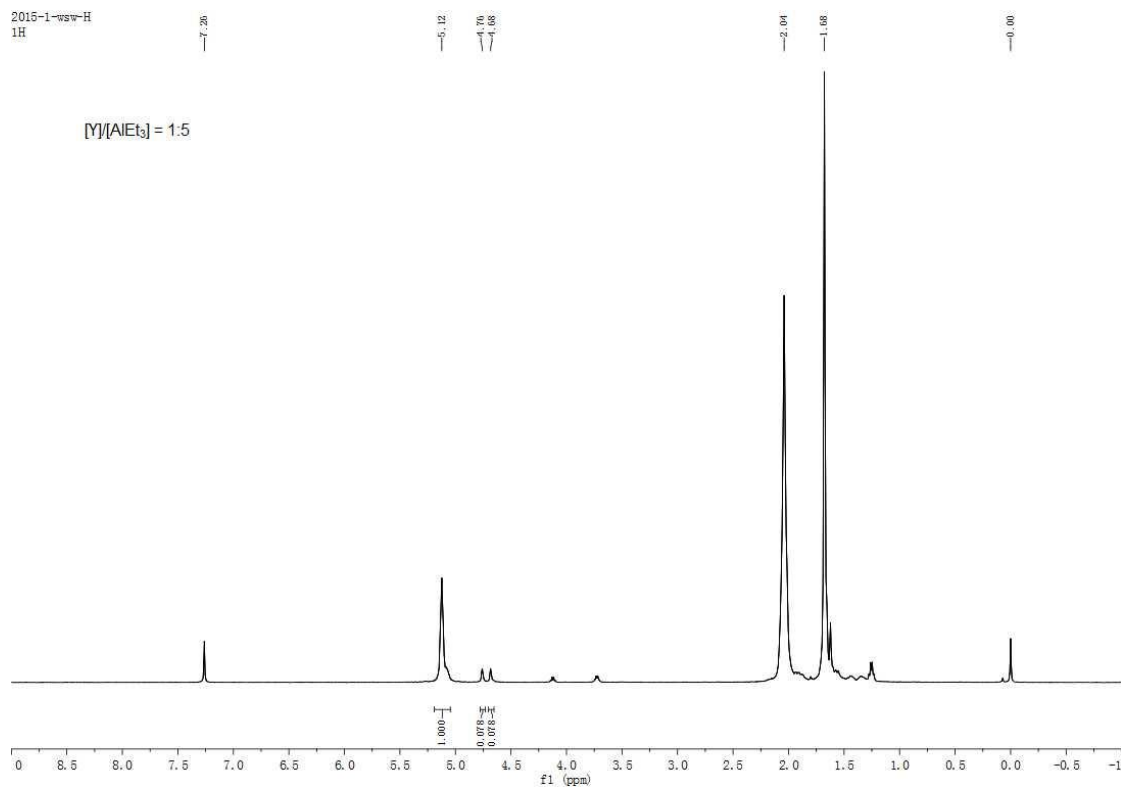

**Fig. S9.**  $^1\text{H}$  NMR spectrum (500 MHz,  $\text{CDCl}_3$ , 298 K) of PIP for entry 3 (Table 2)

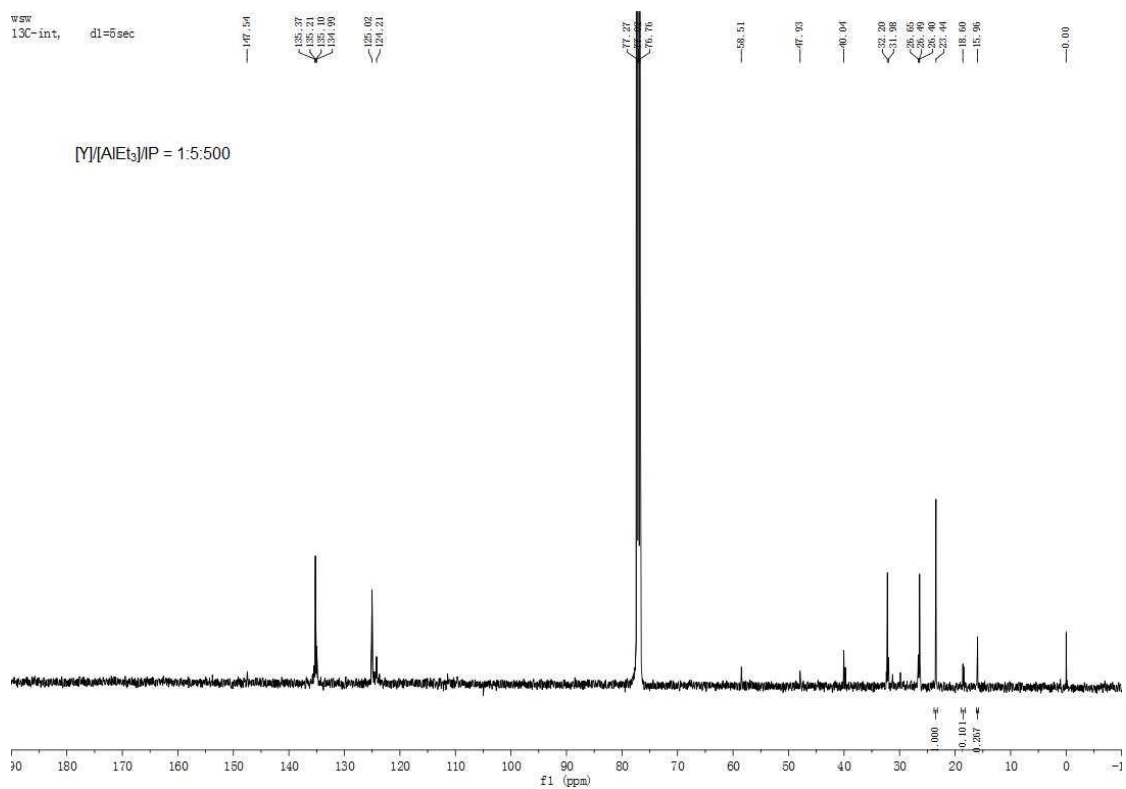

**Fig. S10.** <sup>13</sup>C-int NMR (126 MHz, CDCl<sub>3</sub>, 298 K) spectrum of PIP for entry 3 (Table 2). Scan 12288 times.

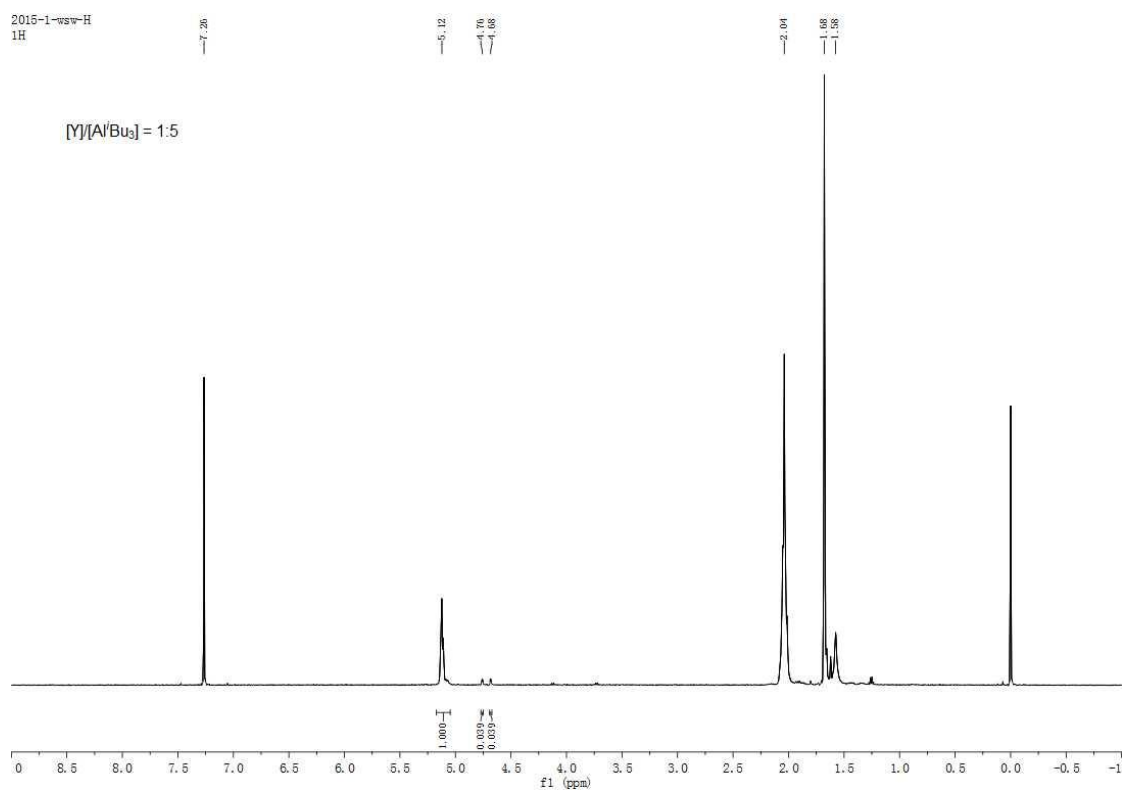

**Fig. S11.** <sup>1</sup>H NMR (500 MHz, CDCl<sub>3</sub>, 298 K) spectrum of PIP for entry 4 (Table 2).

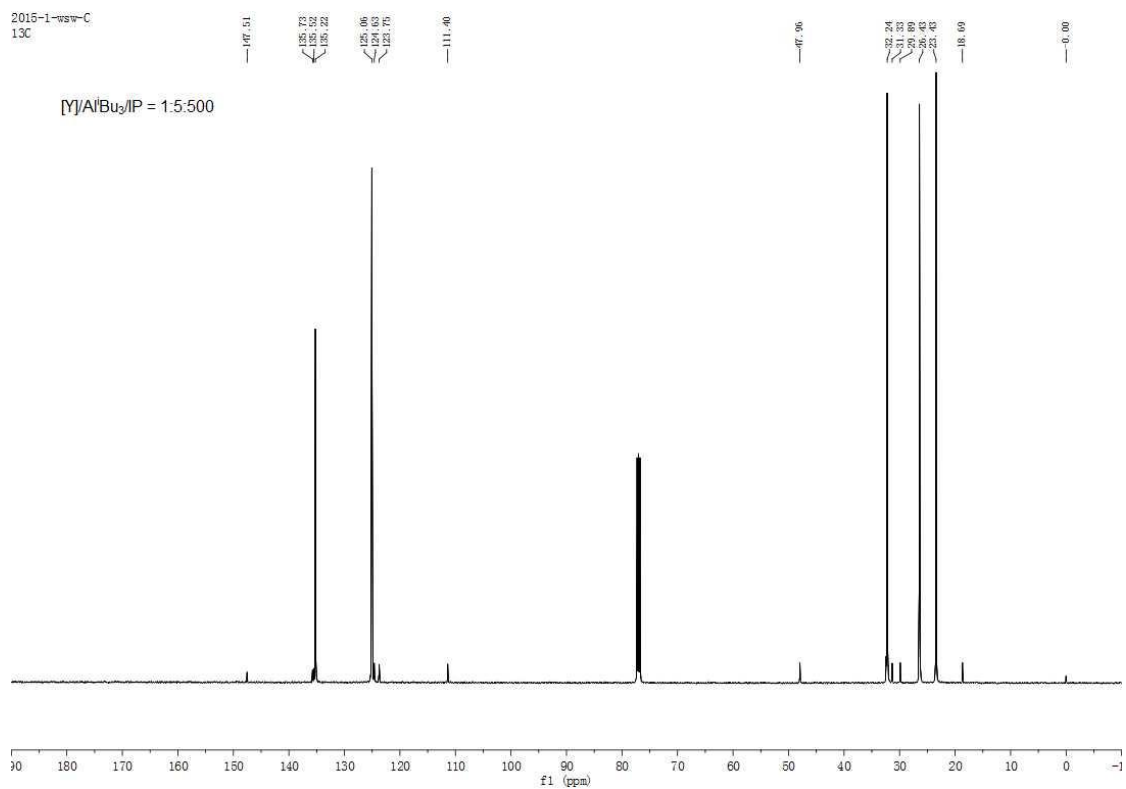

**Fig. S12.** <sup>13</sup>C NMR (126 MHz, CDCl<sub>3</sub>, 298 K) spectrum of PIP for entry 4 (Table 2). Scan 10000 times. No 1, 4-*trans*-polymer.

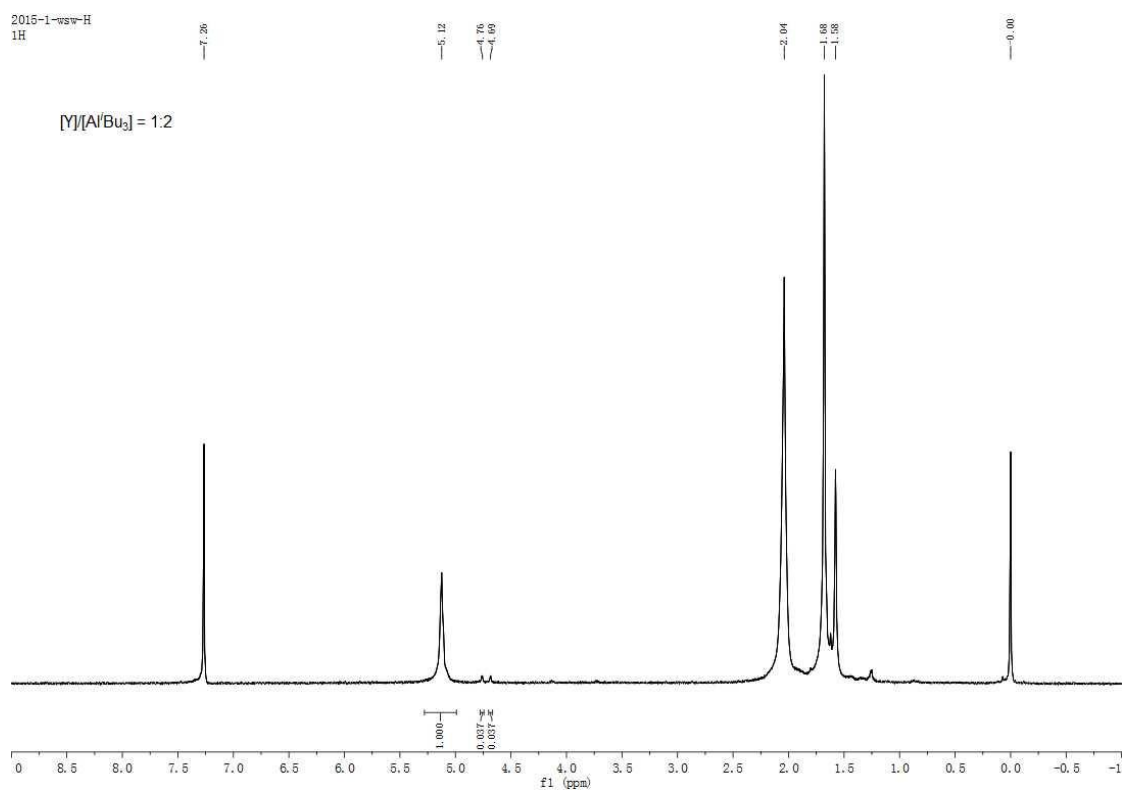

**Fig. S13.** <sup>1</sup>H NMR (500 MHz, CDCl<sub>3</sub>, 298 K) spectrum of PIP for entry 5 (Table 2).



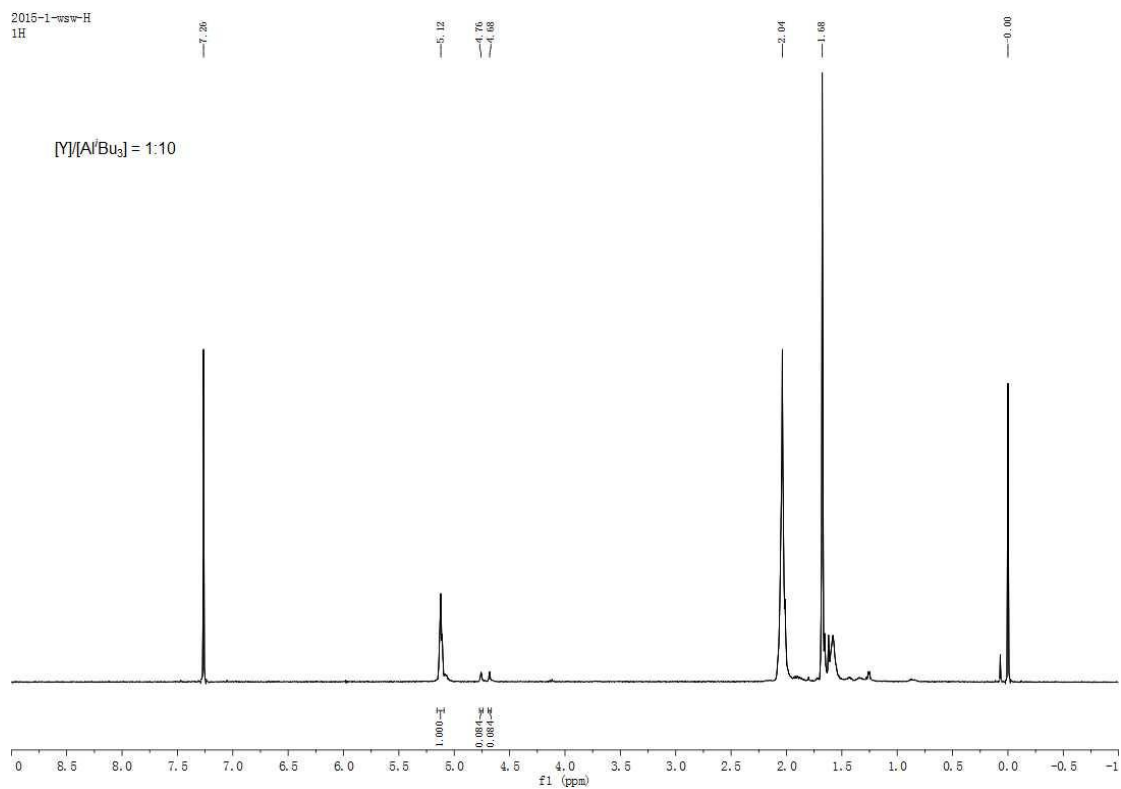

**Fig. S14.** <sup>1</sup>H NMR (500 MHz, CDCl<sub>3</sub>, 298 K) spectrum of PIP for entry 6 (Table 2).

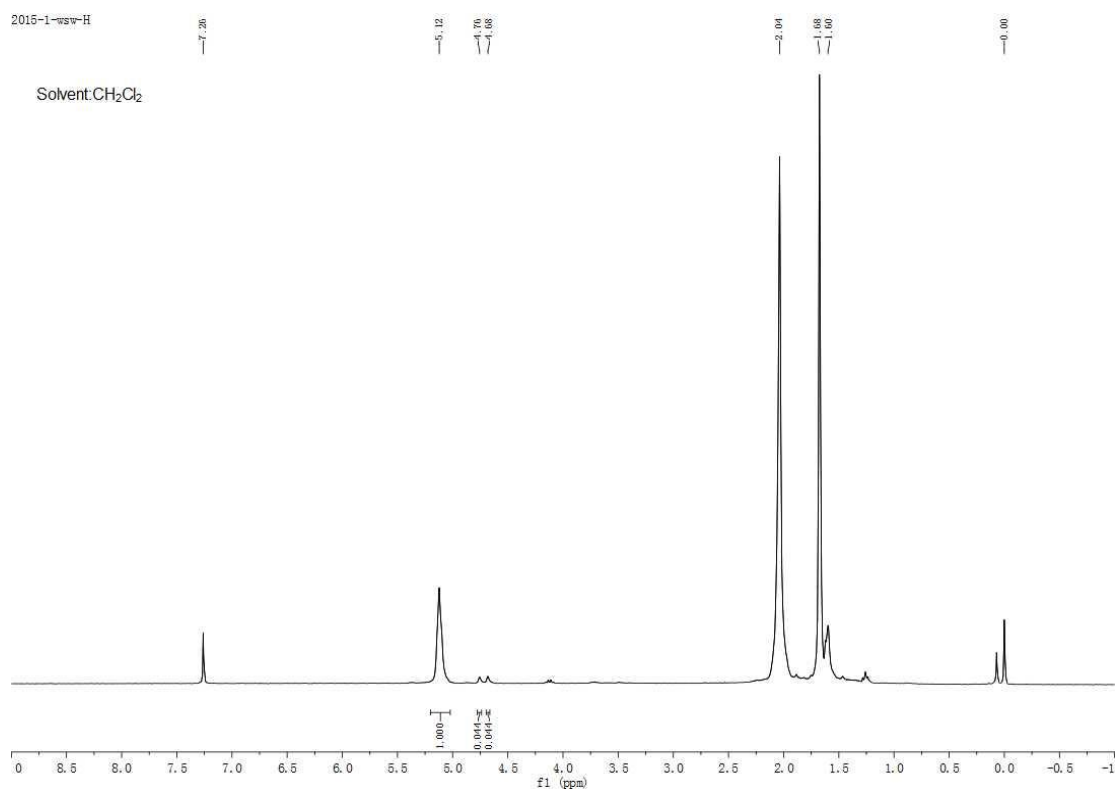

**Fig. S15.** <sup>1</sup>H NMR (500 MHz, CDCl<sub>3</sub>, 298 K) spectrum of PIP for entry 7 (Table 2).

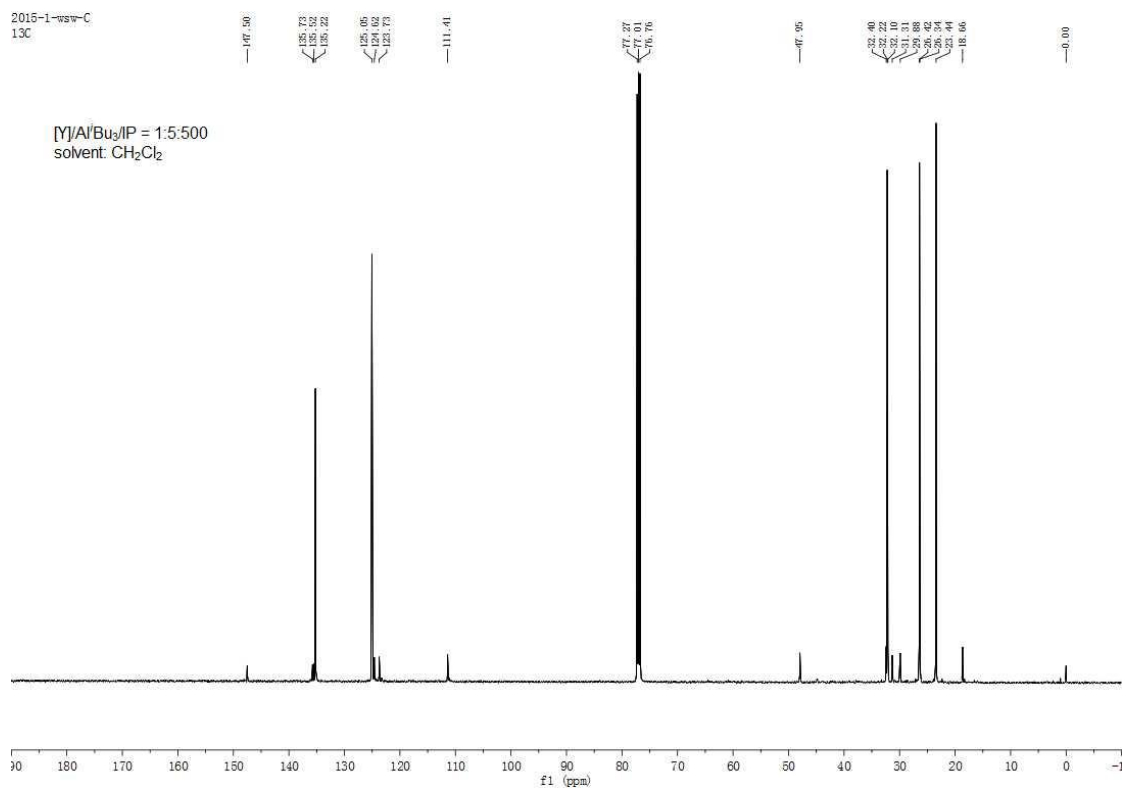

**Fig. S16.** <sup>13</sup>C NMR (126 MHz, CDCl<sub>3</sub>, 298 K) spectrum of PIP for entry 7 (Table 2). Scan 10000 times. No 1, 4-*trans*-polymer.

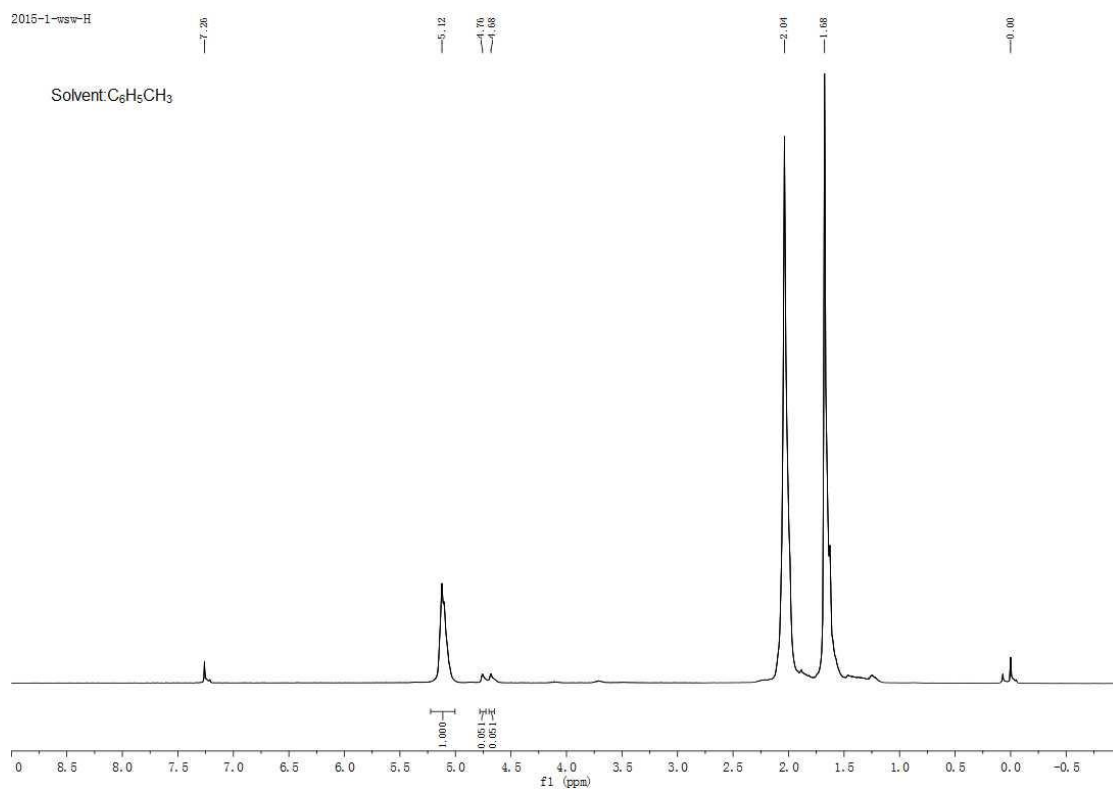

**Fig. S17.** <sup>1</sup>H NMR (500 MHz, CDCl<sub>3</sub>, 298 K) spectrum of PIP for entry 8 (Table 2).

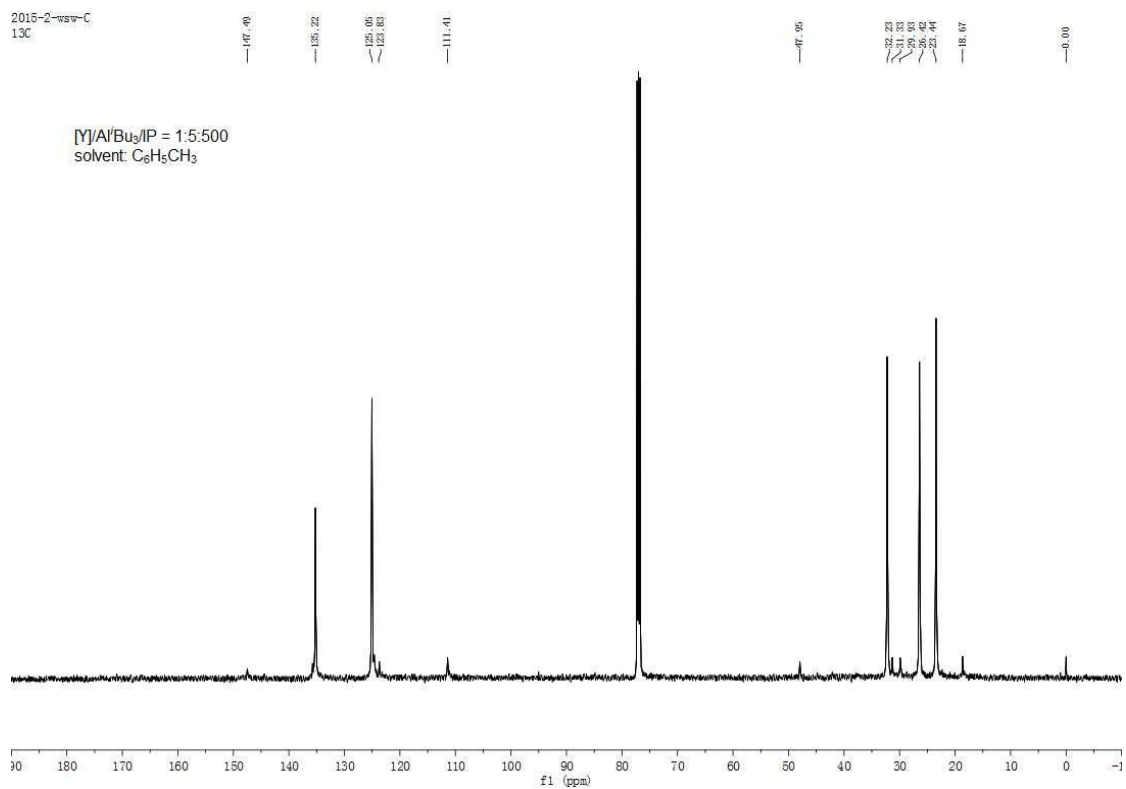

**Fig. S18.** <sup>13</sup>C NMR (126 MHz, CDCl<sub>3</sub>, 298 K) spectrum of PIP for entry 8 (Table 2). Scan 10000 times. No 1, 4-*trans*-polymer.

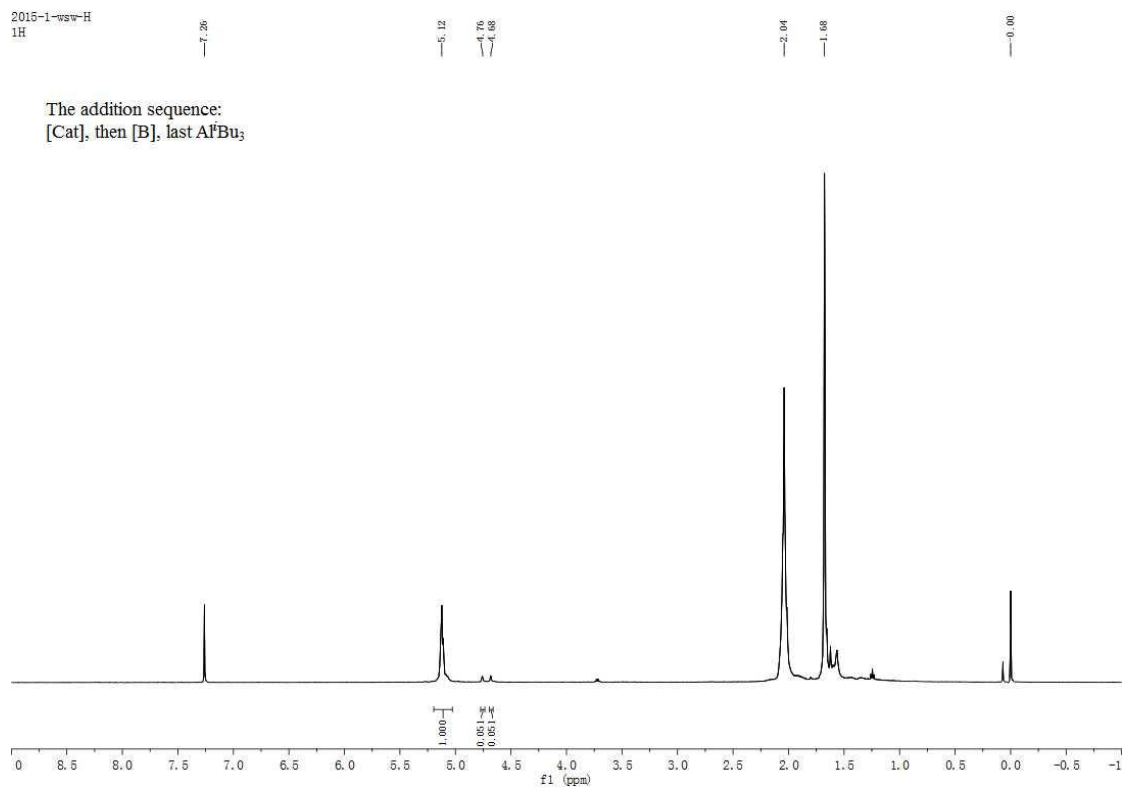

**Fig. S19.** <sup>1</sup>H NMR (500 MHz, CDCl<sub>3</sub>, 298 K) spectrum of PIP for entry 9 (Table 2).

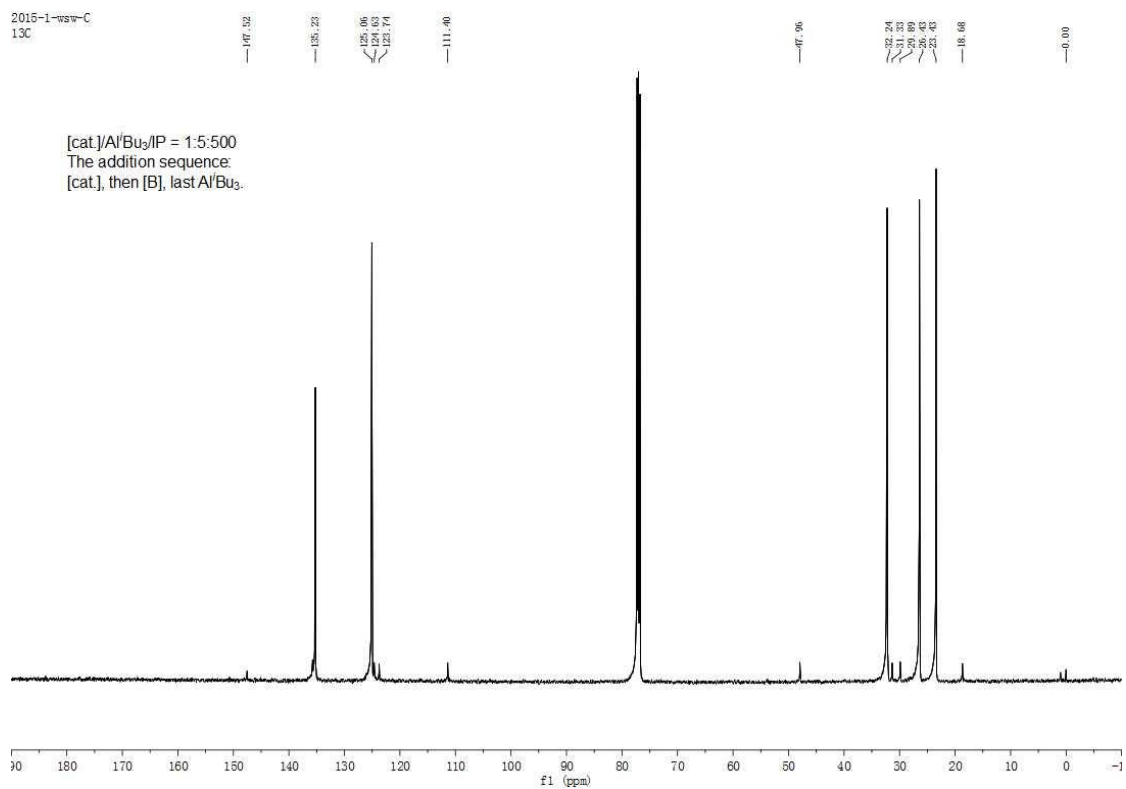

**Fig. S20.** <sup>13</sup>C NMR (126 MHz, CDCl<sub>3</sub>, 298 K) spectrum of PIP for entry 9 (Table 2). Scan 10000 times. No 1, 4-*trans*-polymer.

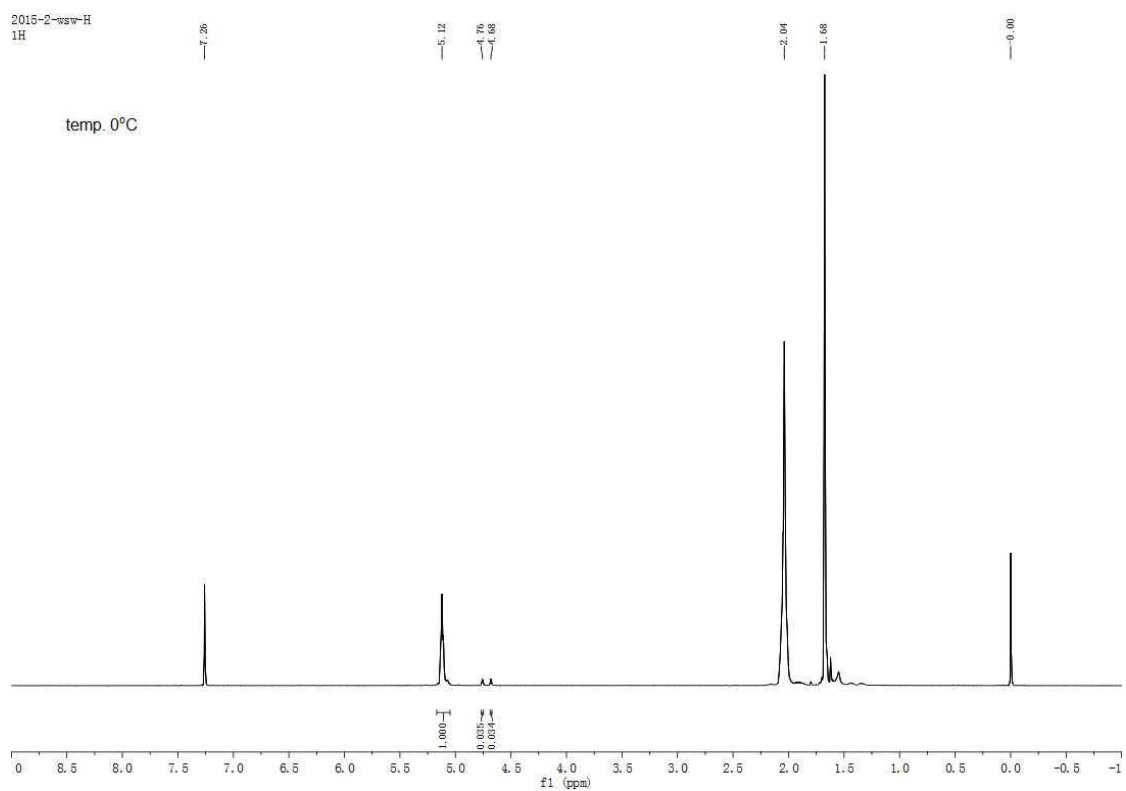

**Fig. S21.** <sup>1</sup>H NMR (500 MHz, CDCl<sub>3</sub>, 298 K) spectrum of PIP for entry 10 (Table 2).

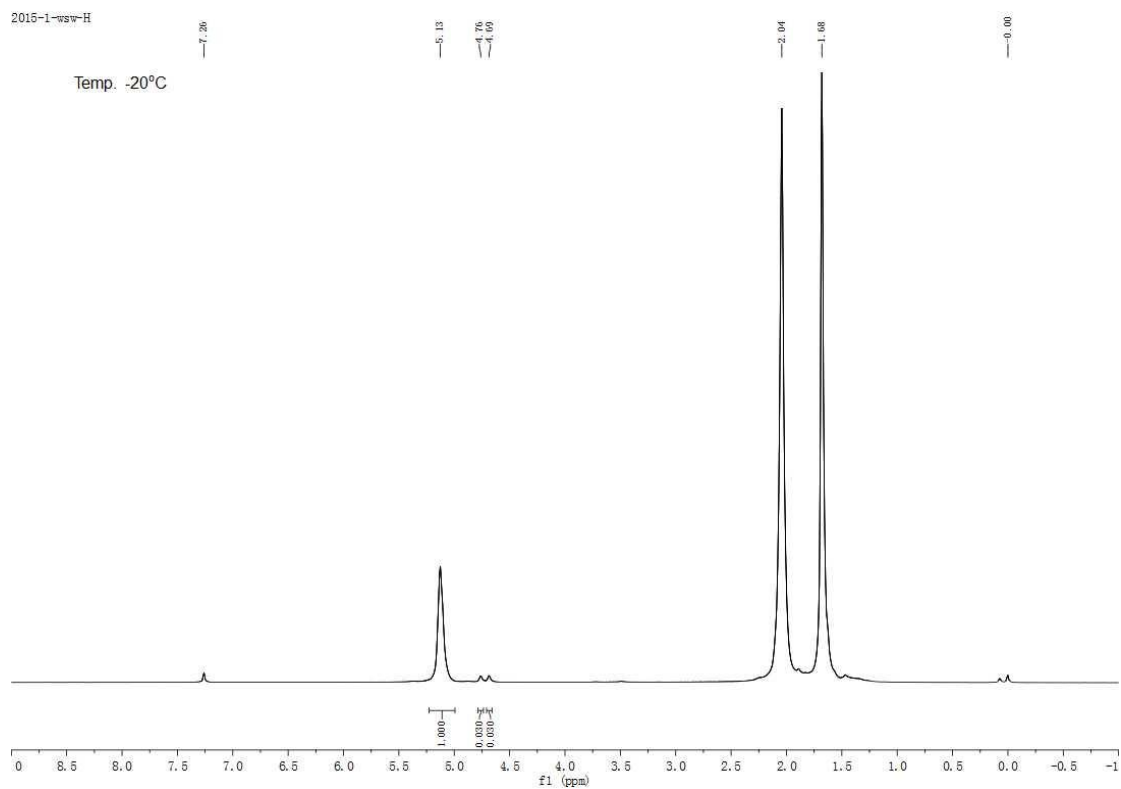

**Fig. S22.**  $^1\text{H}$  NMR (500 MHz,  $\text{CDCl}_3$ , 298 K) spectrum of PIP for entry 11 (Table 2).

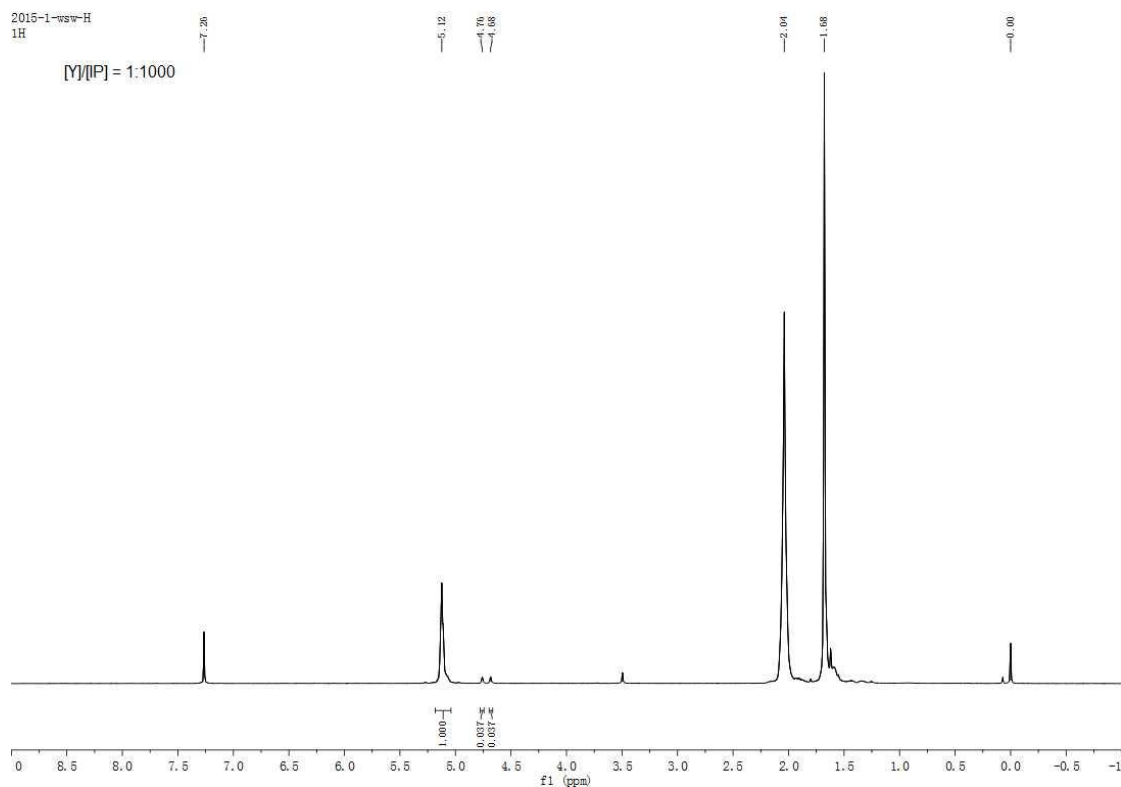

**Fig. S23.**  $^1\text{H}$  NMR (500 MHz,  $\text{CDCl}_3$ , 298 K) spectrum of PIP for entry 12 (Table 2).

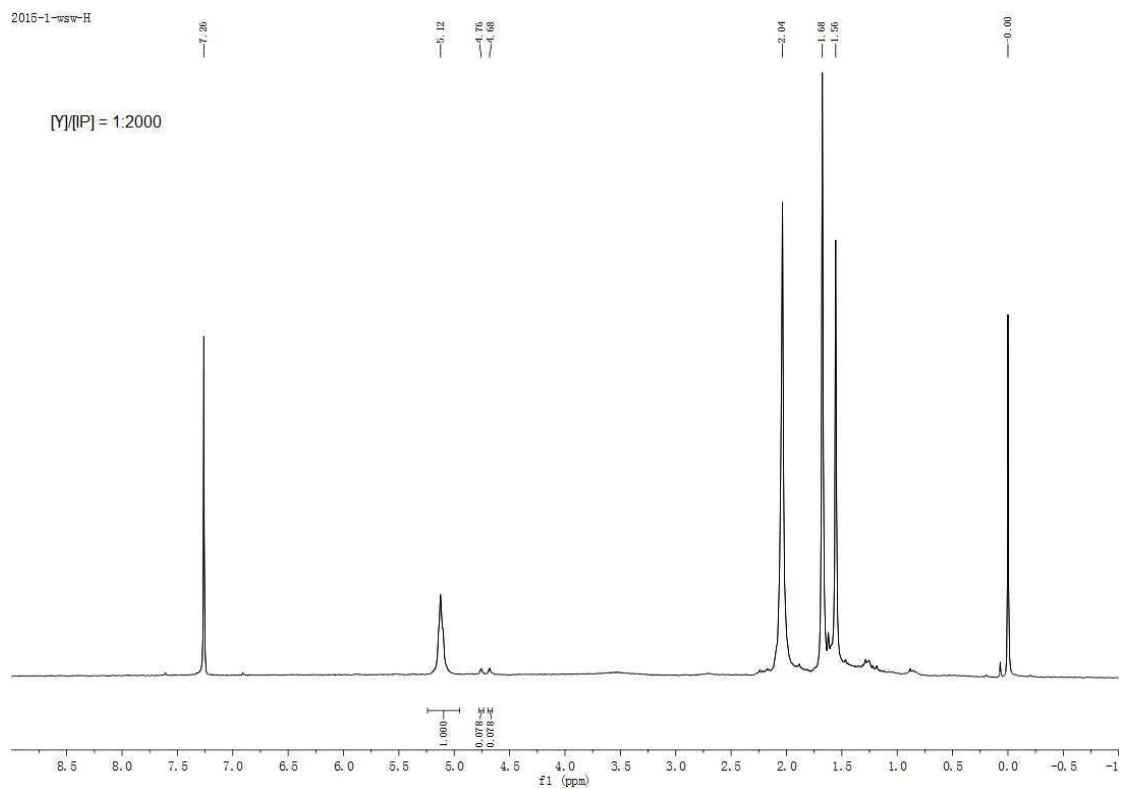

**Fig. S24.**  $^1\text{H}$  NMR (500 MHz,  $\text{CDCl}_3$ , 298 K) spectrum of PIP for entry 13 (Table 2).

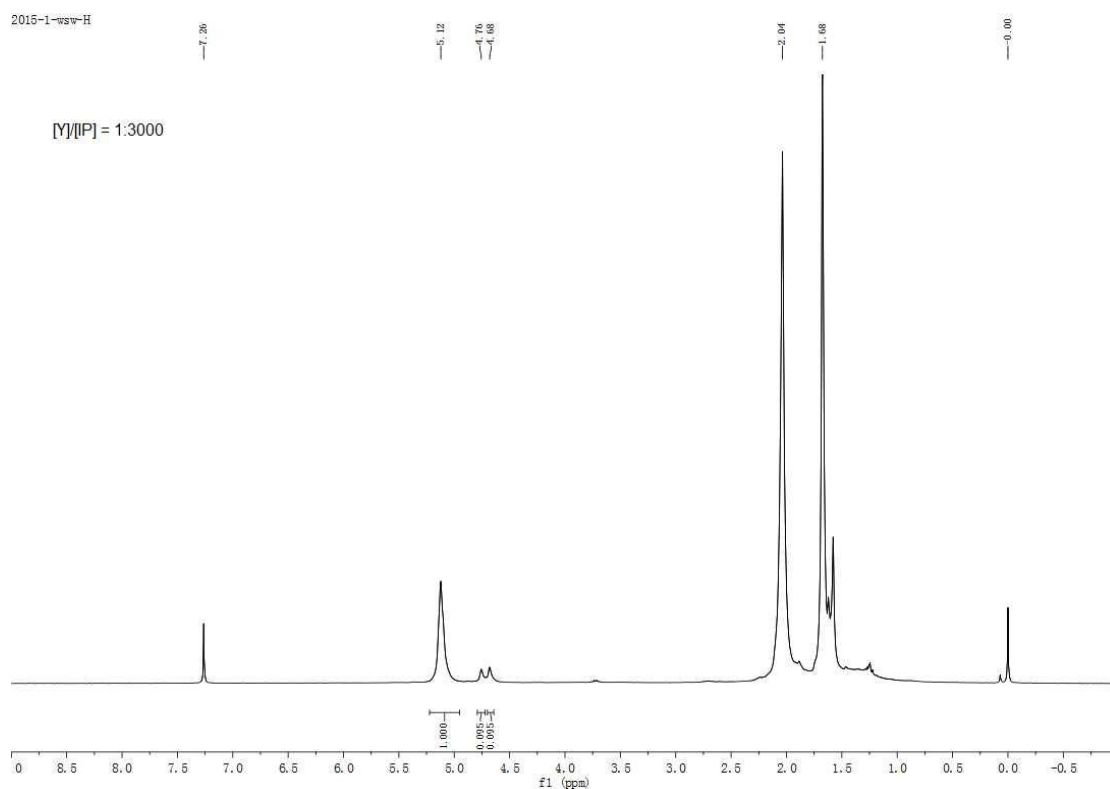

**Fig. S25.**  $^1\text{H}$  NMR (500 MHz,  $\text{CDCl}_3$ , 298 K) spectrum of PIP for entry 14 (Table 2).

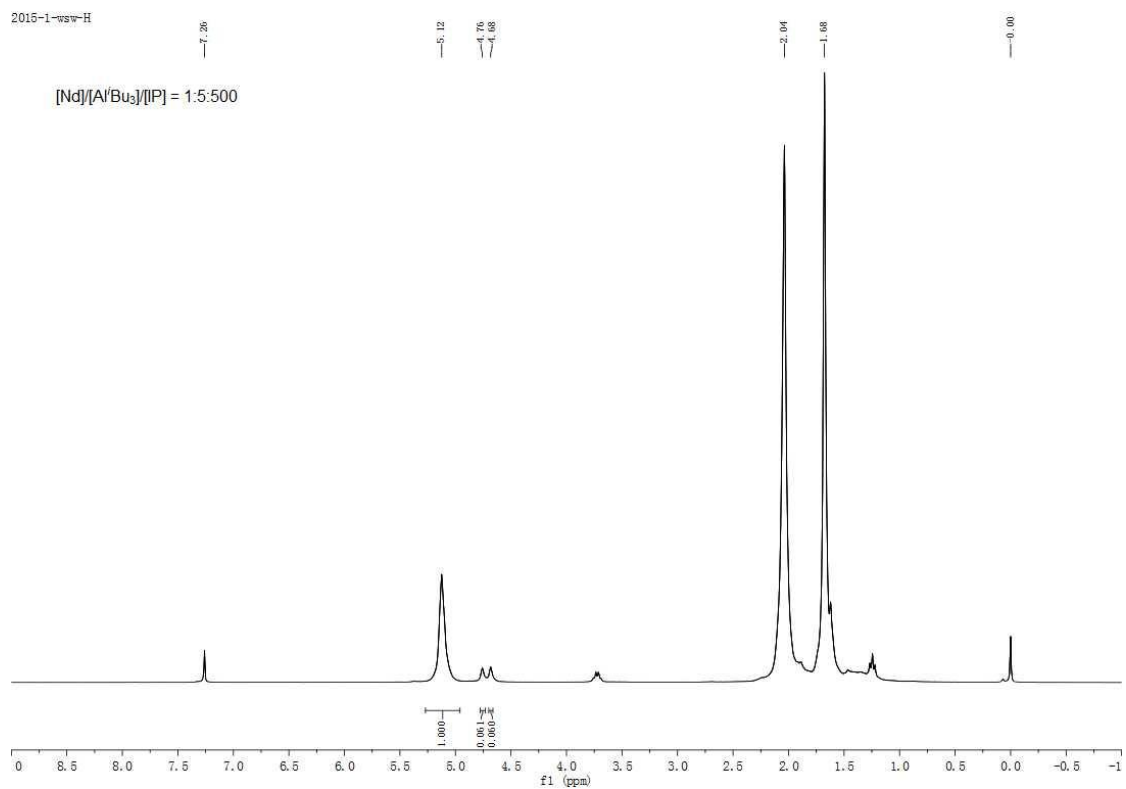

**Fig. S26.** <sup>1</sup>H NMR (500 MHz, CDCl<sub>3</sub>, 298 K) spectrum of PIP for entry 2 (Table 3).

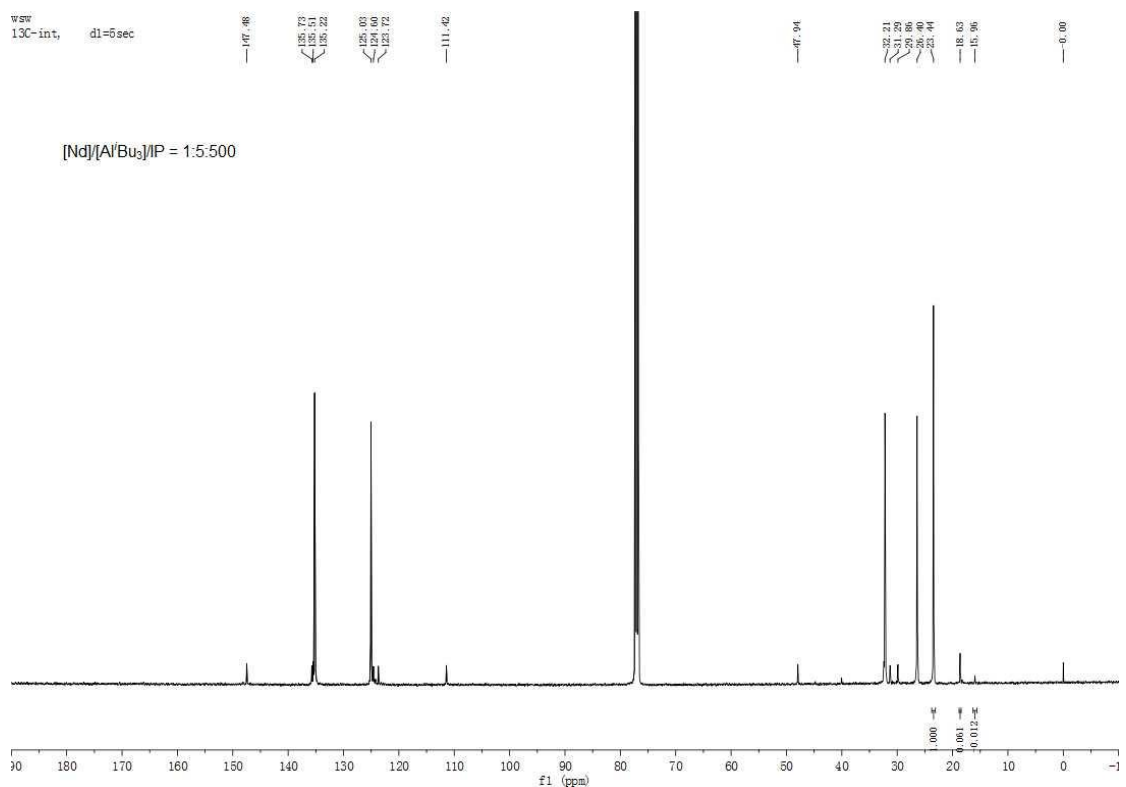

**Fig. S27.** <sup>13</sup>C-int NMR (126 MHz, CDCl<sub>3</sub>, 298 K) spectrum of PIP for entry 2 (Table 3). Scan 12288 times.

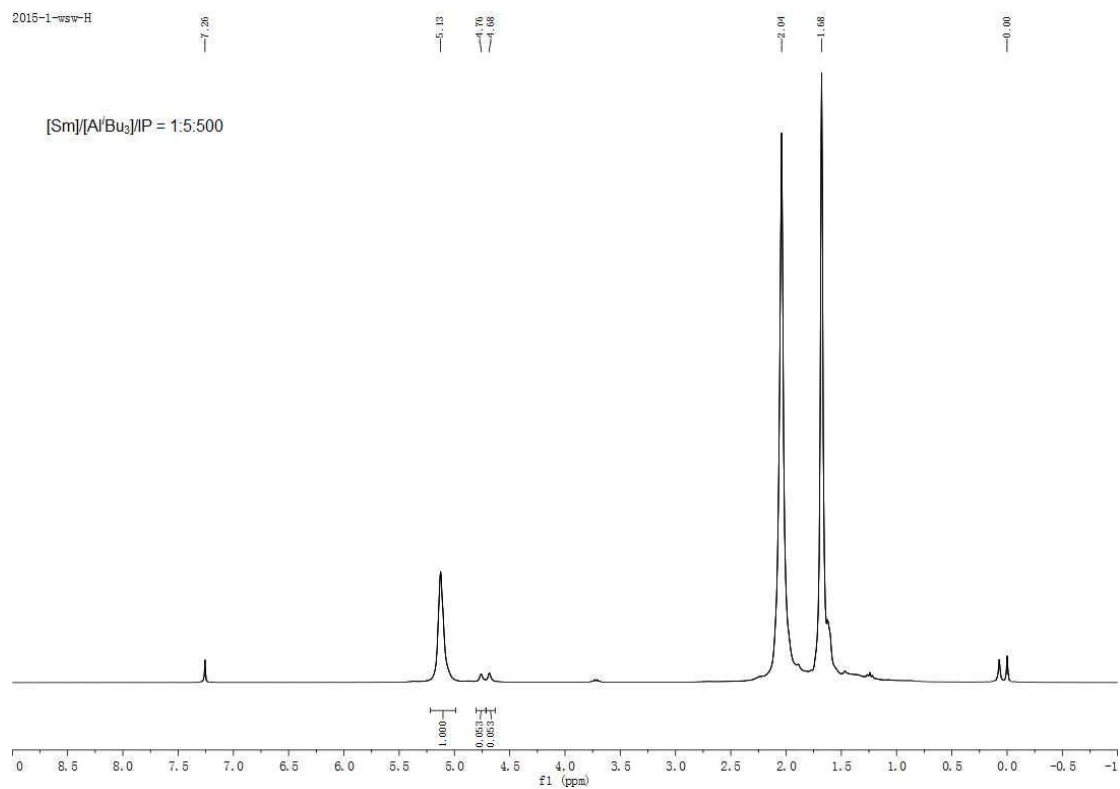

**Fig. S28.** <sup>1</sup>H NMR (500 MHz, CDCl<sub>3</sub>, 298 K) spectrum of PIP for entry 3 (Table 3).

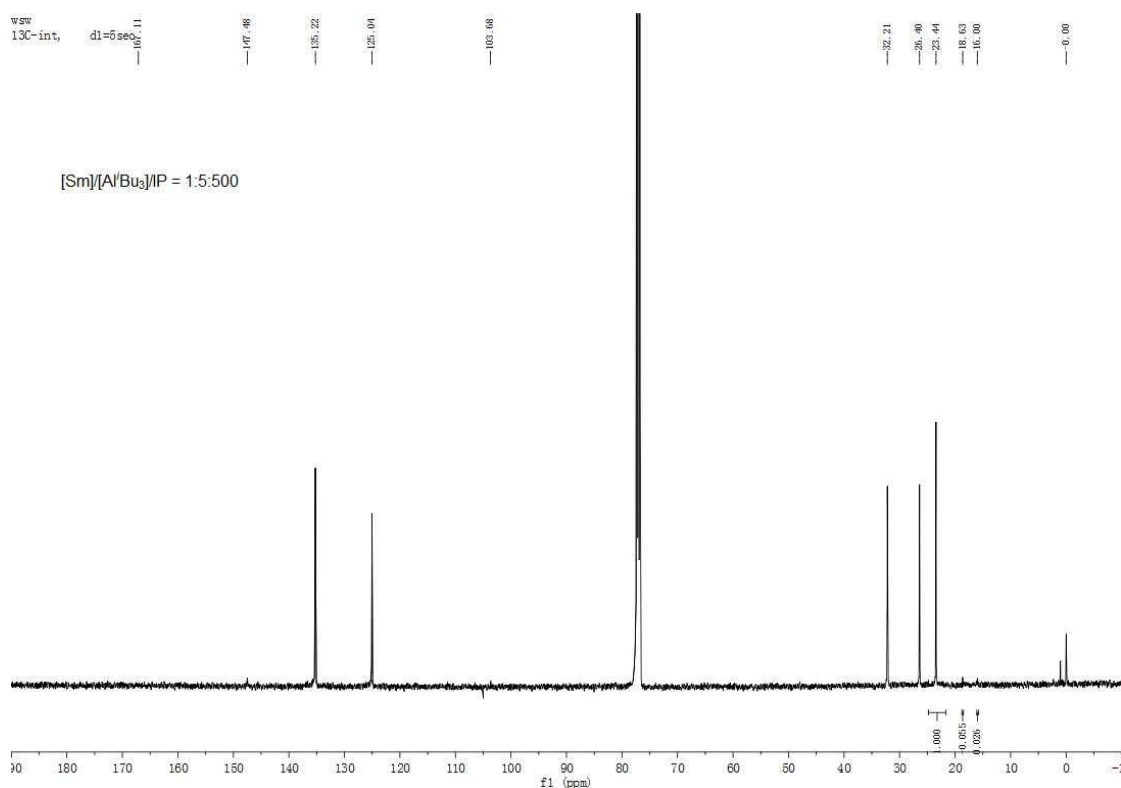

**Fig. S29.** <sup>13</sup>C-int NMR (126 MHz, CDCl<sub>3</sub>, 298 K) spectrum of PIP for entry 3 (Table 3). Scan 5570 times.



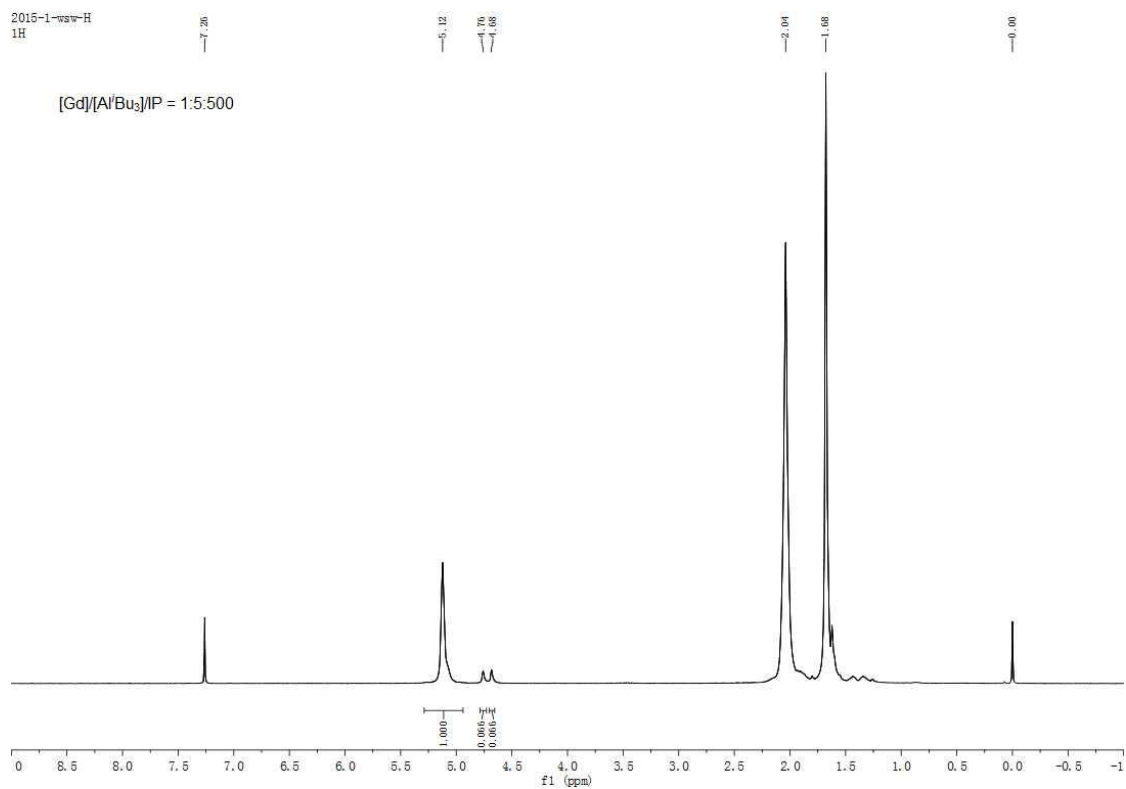

**Fig. S30.** <sup>1</sup>H NMR (500 MHz, CDCl<sub>3</sub>, 298 K) spectrum of PIP for entry 4 (Table 3).

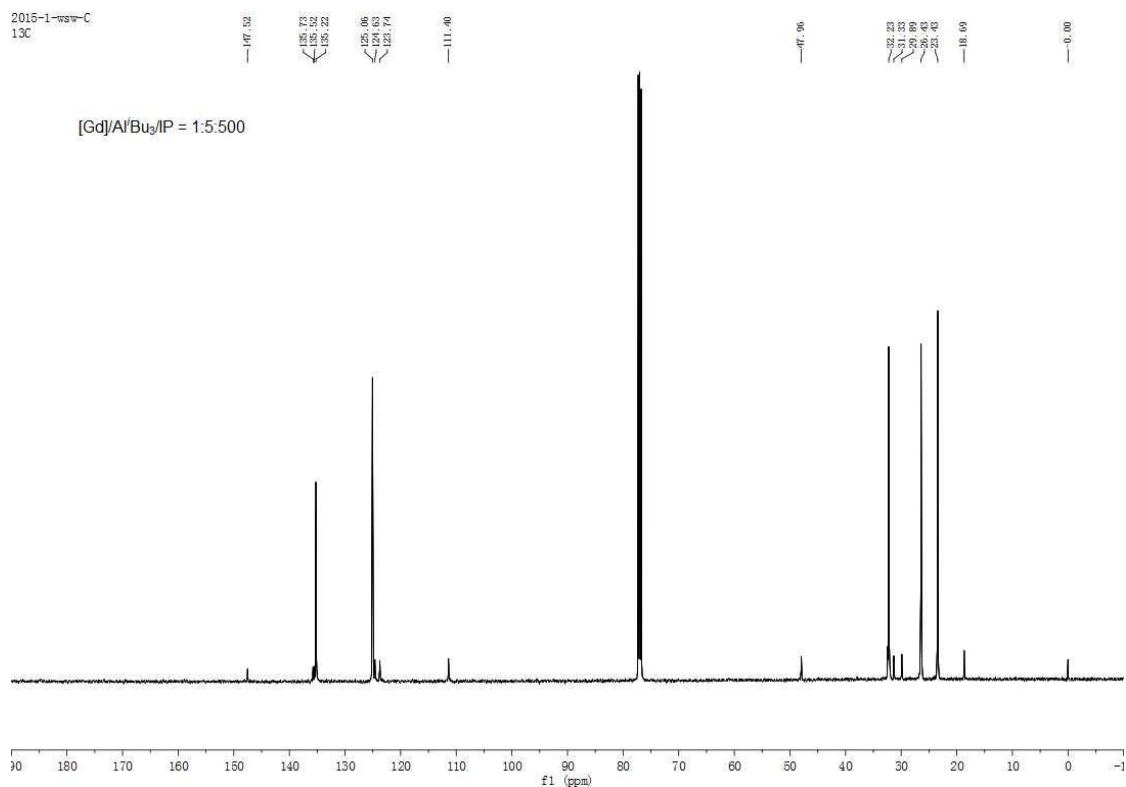

**Fig. S31.** <sup>13</sup>C NMR (126 MHz, CDCl<sub>3</sub>, 298 K) spectrum of PIP for entry 4 (Table 3). Scan 3000 times. No 1, 4-*trans*-polymer.

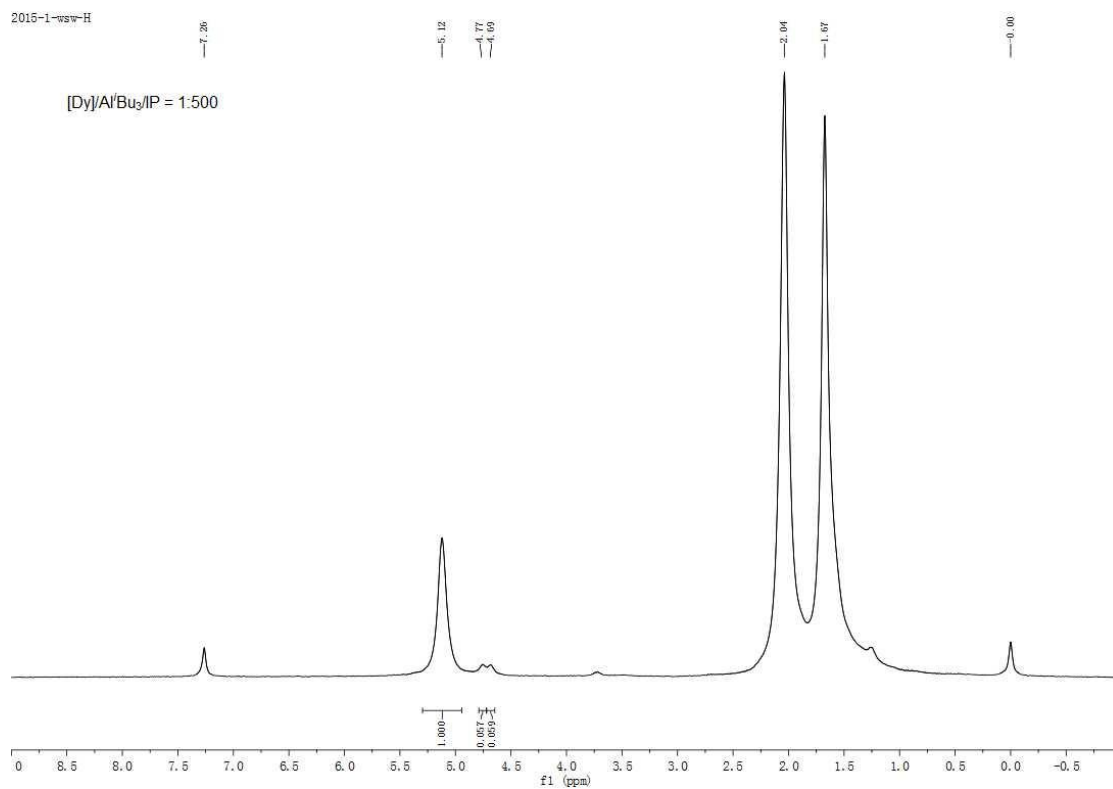

**Fig. S32.** <sup>1</sup>H NMR (500 MHz, CDCl<sub>3</sub>, 298 K) spectrum of PIP for entry 5 (Table 3).

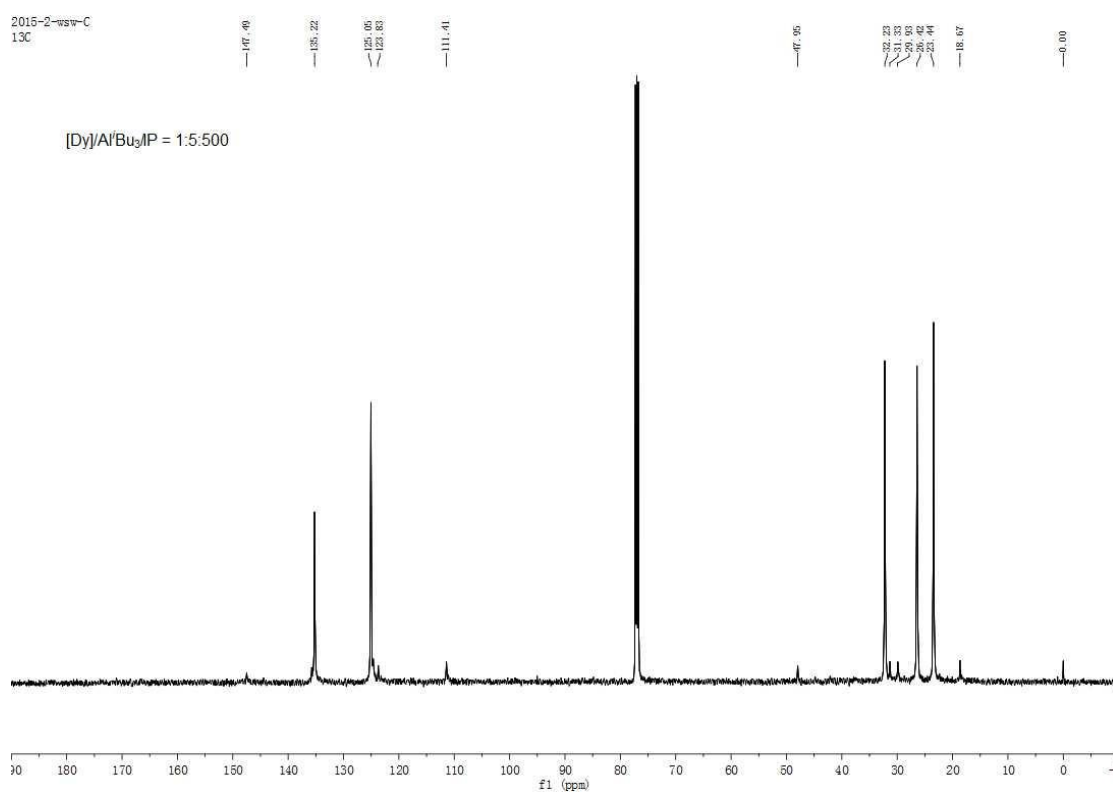

**Fig. S33.** <sup>13</sup>C NMR (126 MHz, CDCl<sub>3</sub>, 298 K) spectrum of PIP for entry 5 (Table 3). Scan 10240 times. No 1, 4-*trans*-polymer.

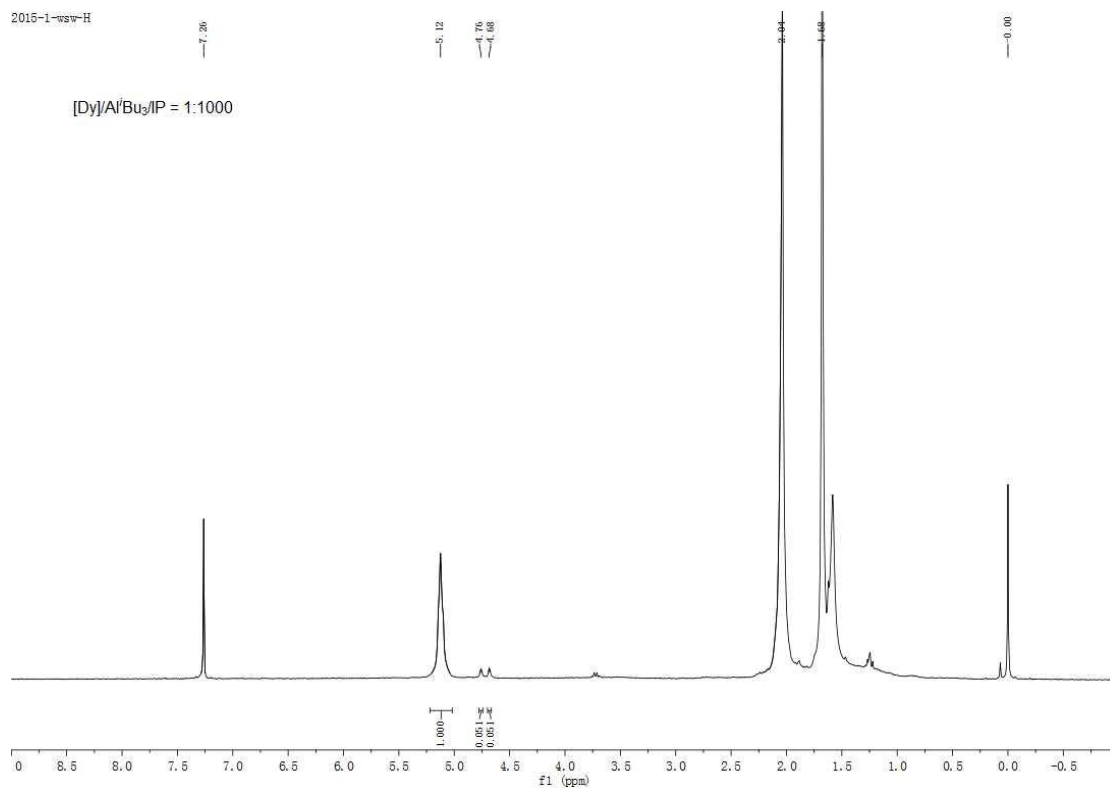

**Fig. S34.** <sup>1</sup>H NMR (500 MHz, CDCl<sub>3</sub>, 298 K) spectrum of PIP for entry 6 (Table 3).

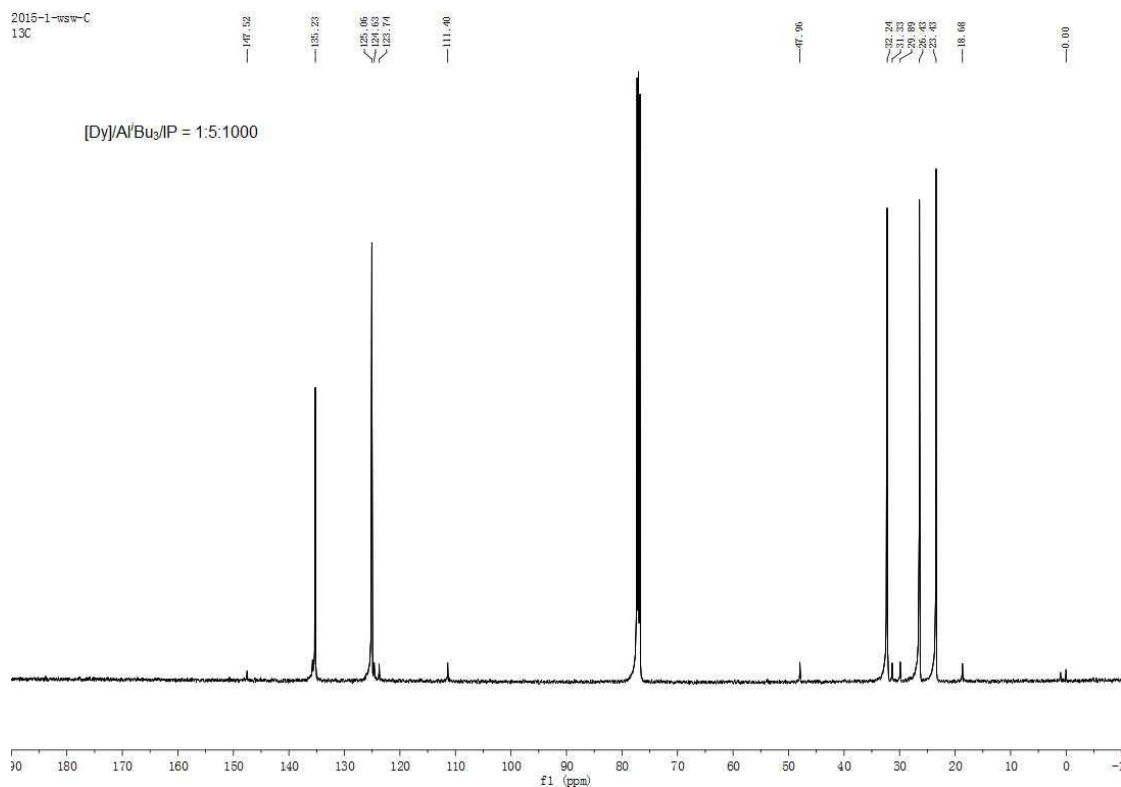

**Fig. S35.** <sup>13</sup>C NMR (126 MHz, CDCl<sub>3</sub>, 298 K) spectrum of PIP for entry 6 (Table 3). Scan 8000 times. No 1, 4-*trans*-polymer.

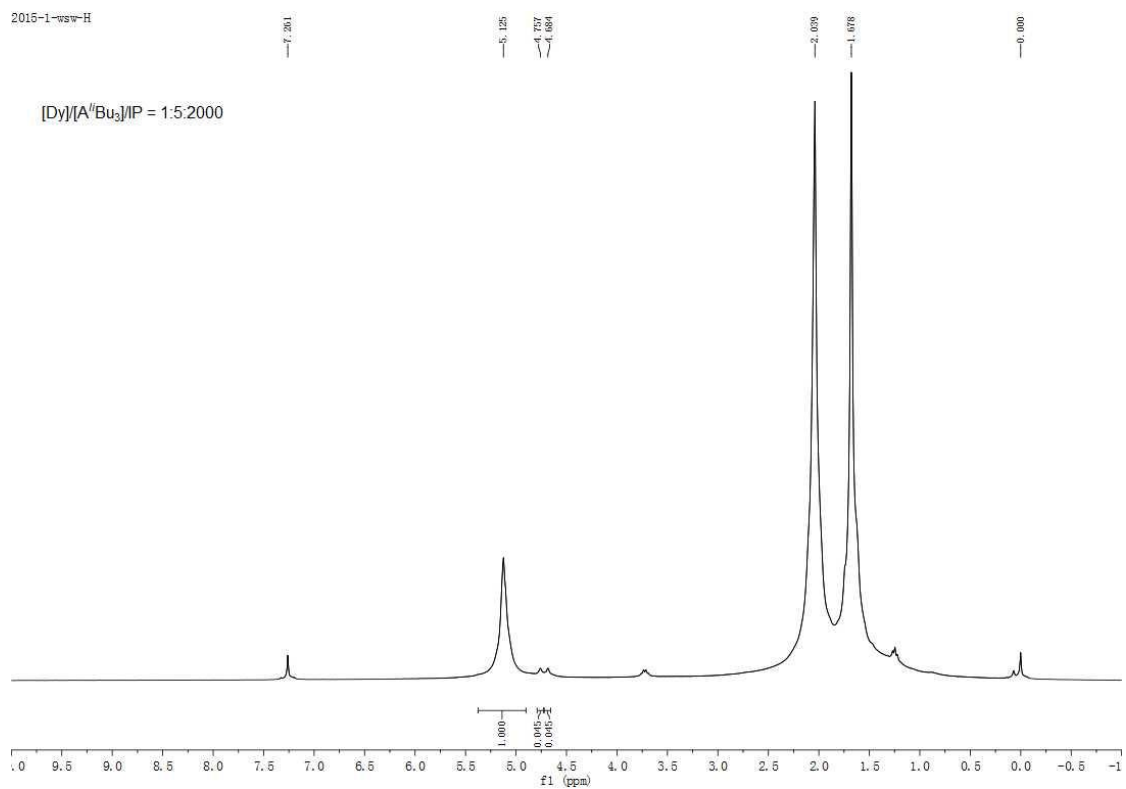

**Fig. S36.** <sup>1</sup>H NMR (500 MHz, CDCl<sub>3</sub>, 298 K) spectrum of PIP for entry 7 (Table 3).

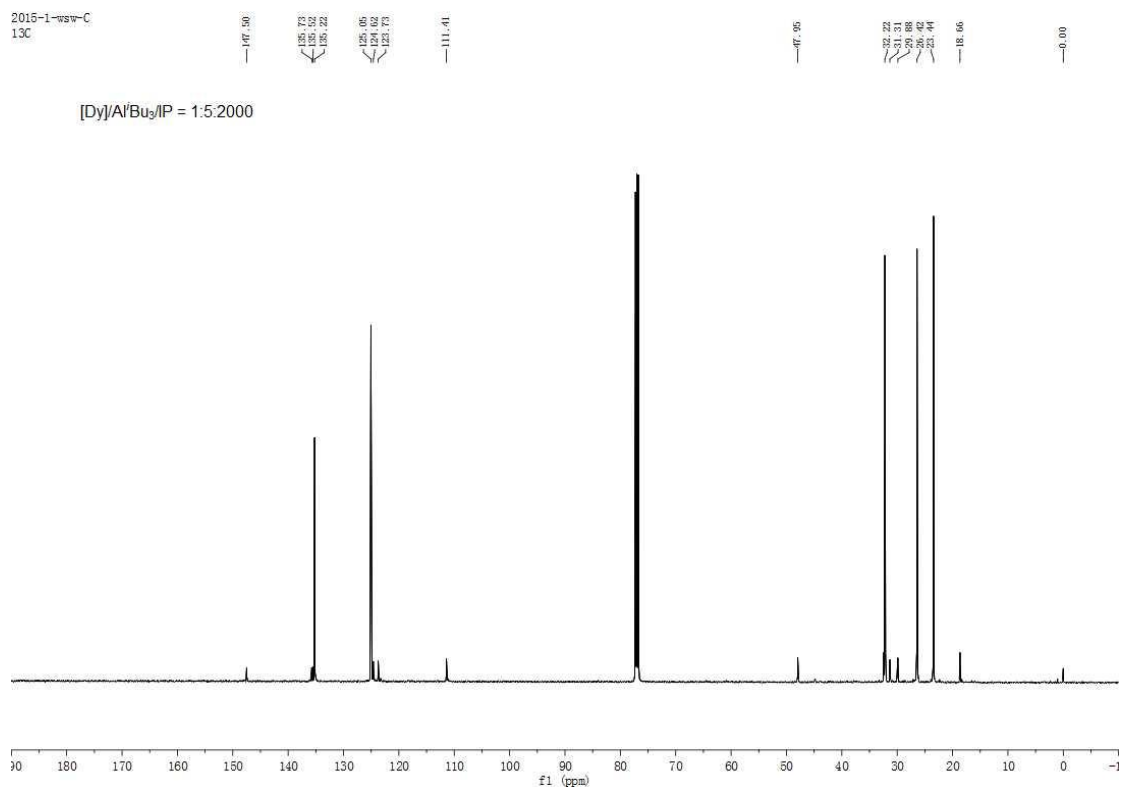

**Fig. S37.** <sup>13</sup>C NMR (126 MHz, CDCl<sub>3</sub>, 298 K) spectrum of PIP for entry 7 (Table 3). Scan 10000 times. No 1, 4-*trans*-polymer.

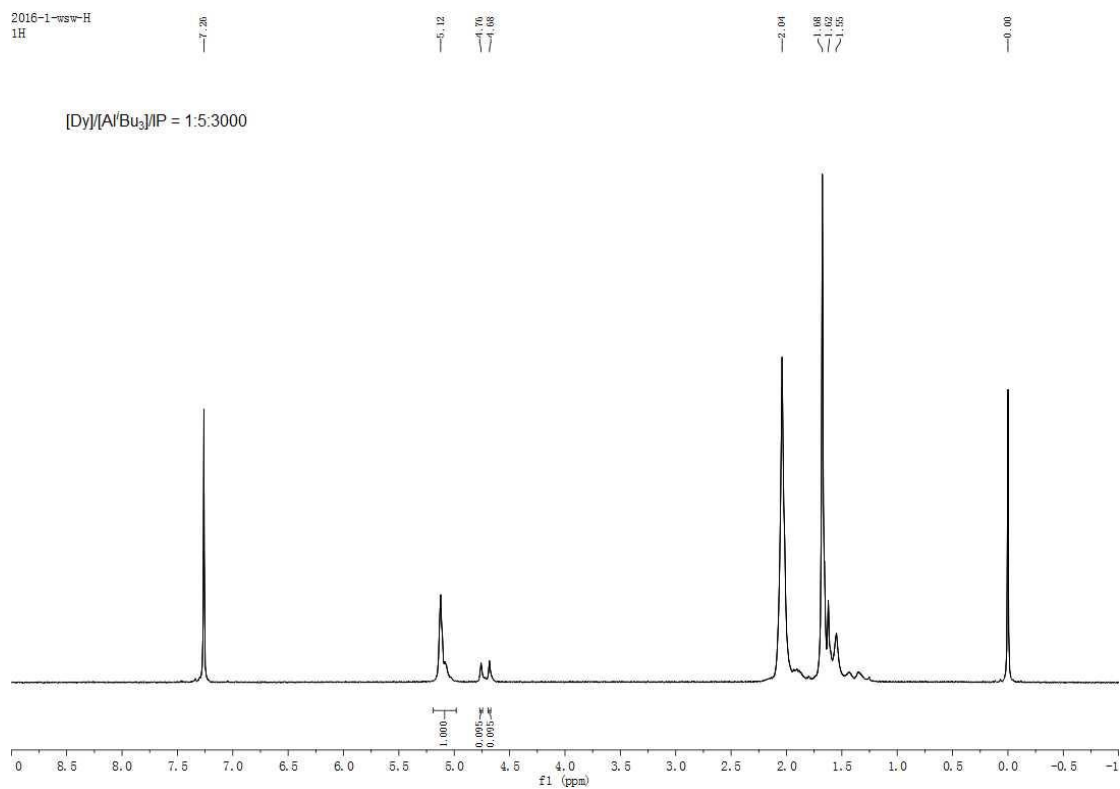

**Fig. S38.** <sup>1</sup>H NMR (500 MHz, CDCl<sub>3</sub>, 298 K) spectrum of PIP for entry 8 (Table 3).

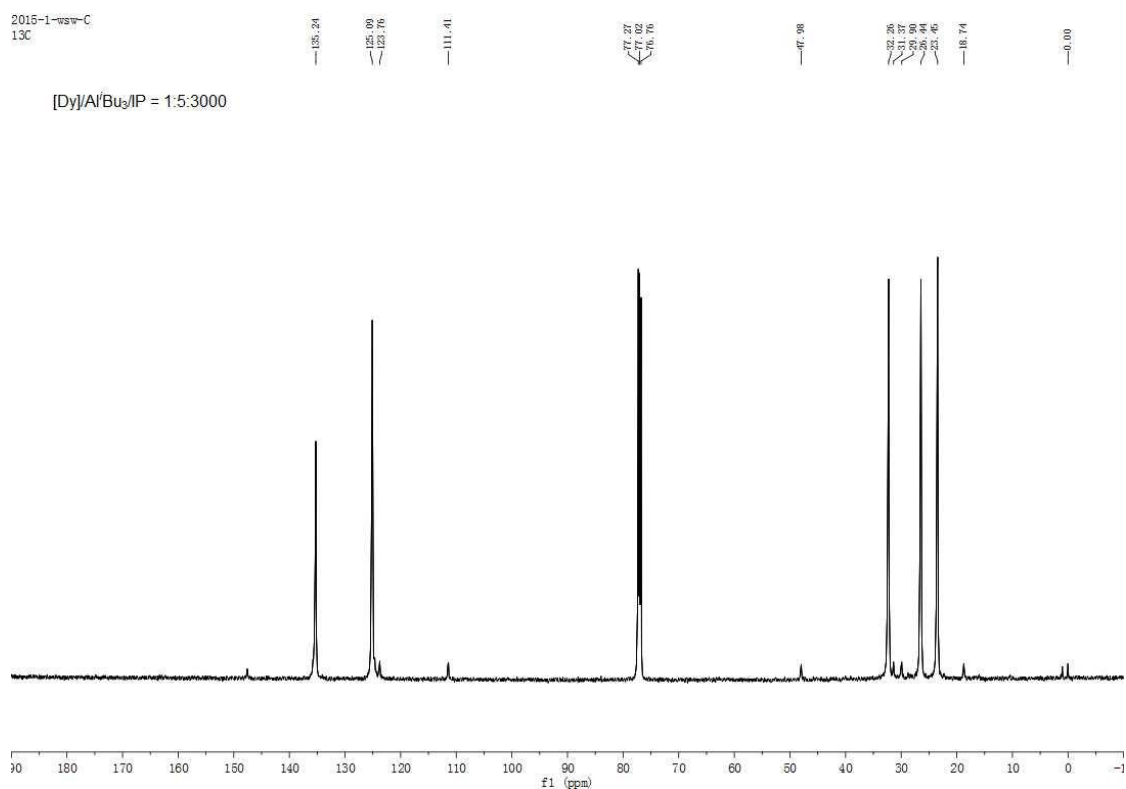

**Fig. S39.** <sup>13</sup>C NMR (126 MHz, CDCl<sub>3</sub>, 298 K) spectrum of PIP for entry 8 (Table 3). Scan 10000 times. No 1, 4-*trans*-polymer.

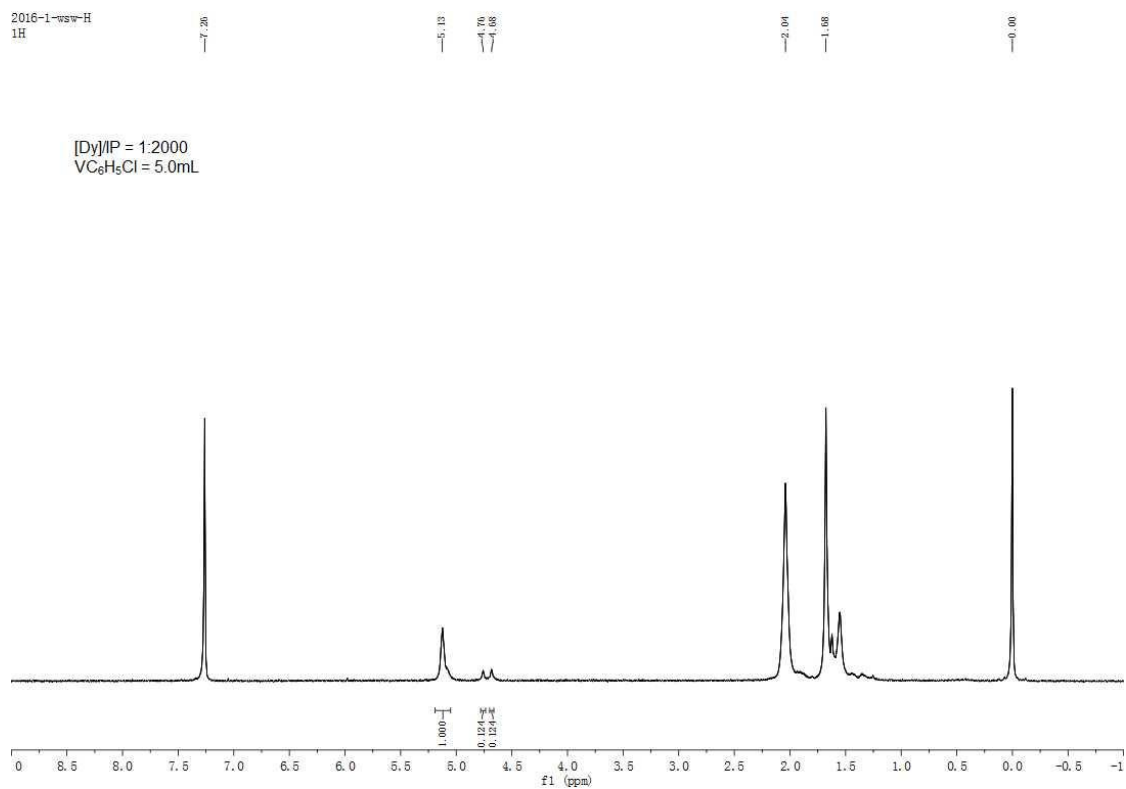

**Fig. S40.** <sup>1</sup>H NMR (500 MHz, CDCl<sub>3</sub>, 298 K) spectrum of PIP for entry 9 (Table 3).

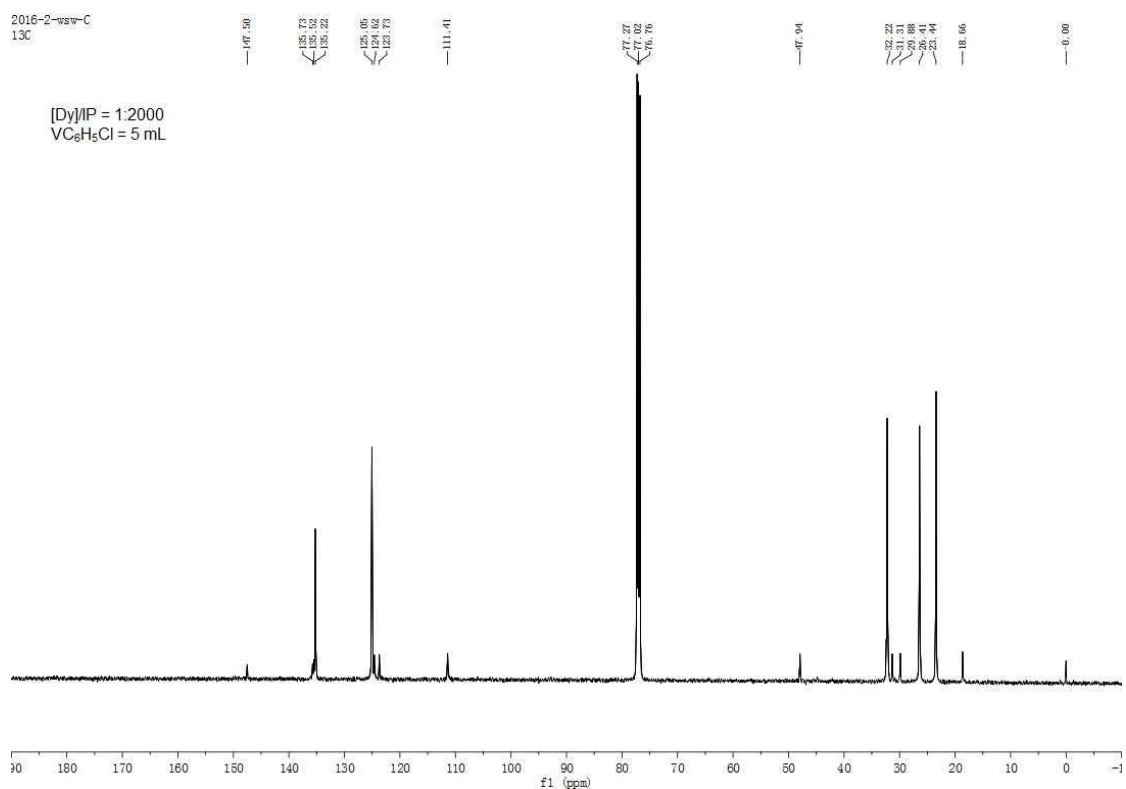

**Fig. S41.** <sup>13</sup>C NMR (126 MHz, CDCl<sub>3</sub>, 298 K) spectrum of PIP for entry 9 (Table 3). Scan 10240 times. No 1, 4-*trans*-polymer.

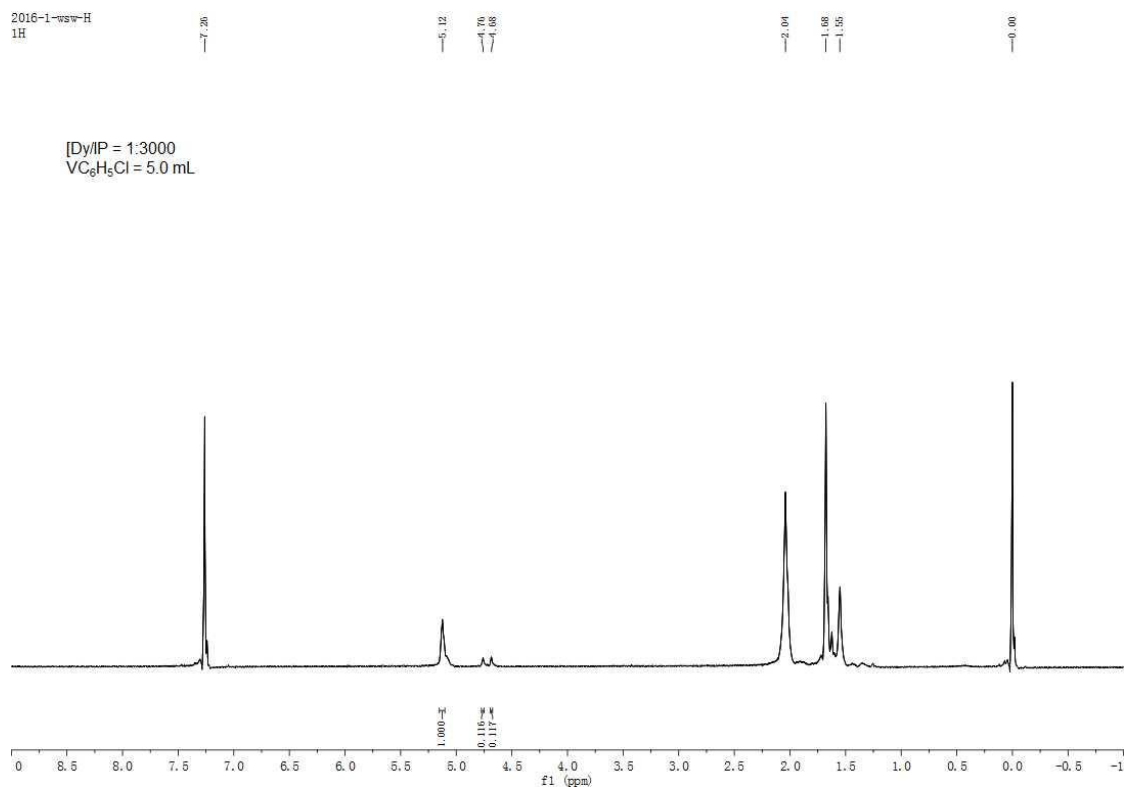

**Fig. S42.** <sup>1</sup>H NMR (500 MHz, CDCl<sub>3</sub>, 298 K) spectrum of PIP for entry 10 (Table 3).

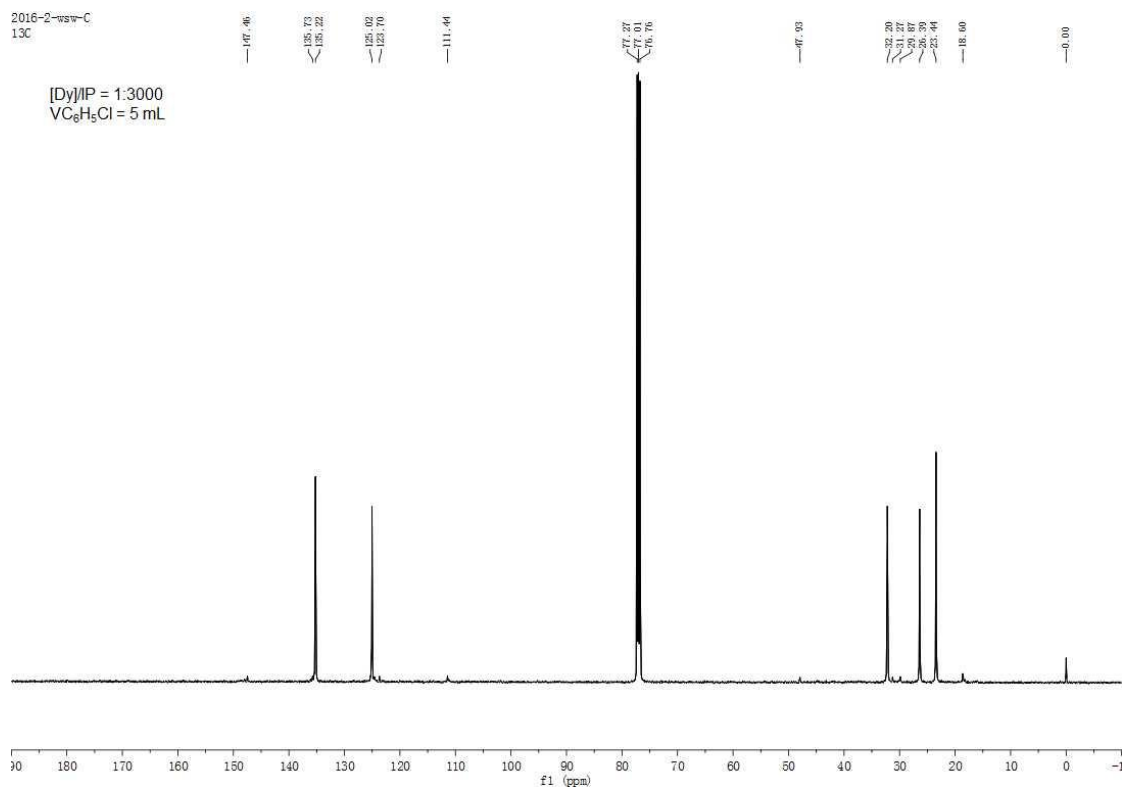

**Fig. S43.** <sup>13</sup>C NMR (126 MHz, CDCl<sub>3</sub>, 298 K) spectrum of PIP for entry 10 (Table 3). Scan 10240 times. No 1, 4-*trans*-polymer.

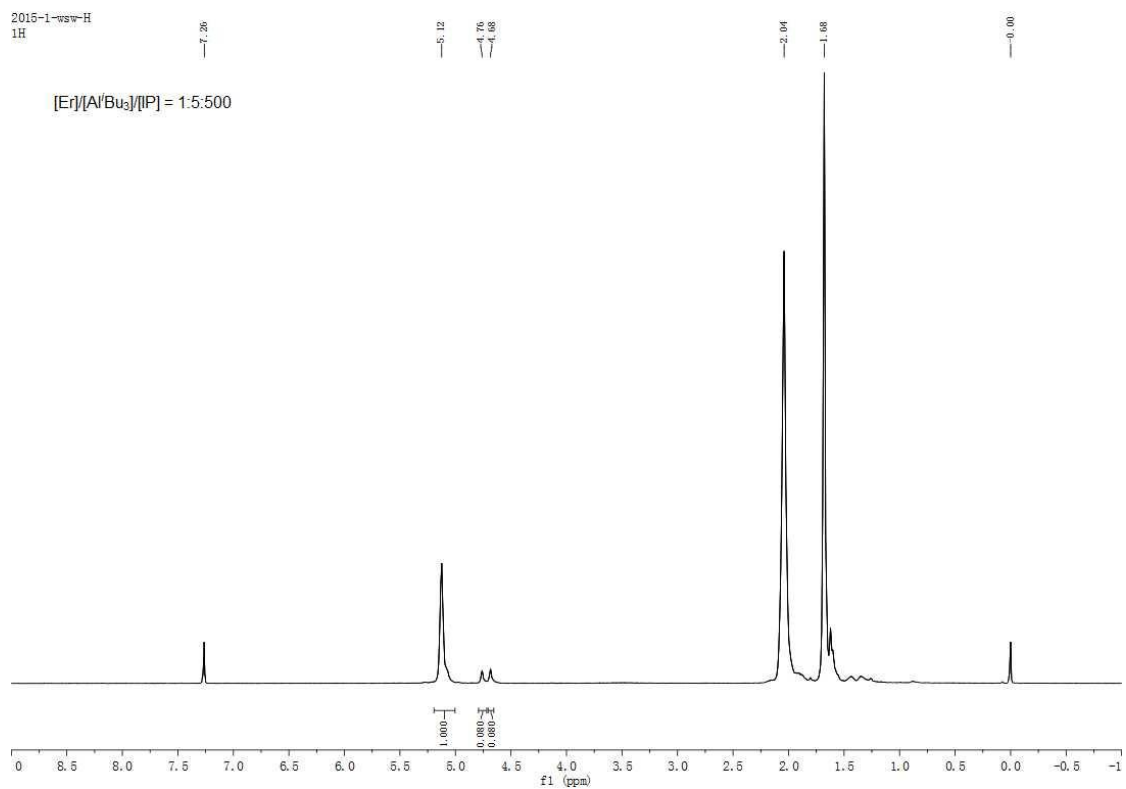

**Fig. S44.** <sup>1</sup>H NMR (500 MHz, CDCl<sub>3</sub>, 298 K) spectrum of PIP for entry 11 (Table 3).

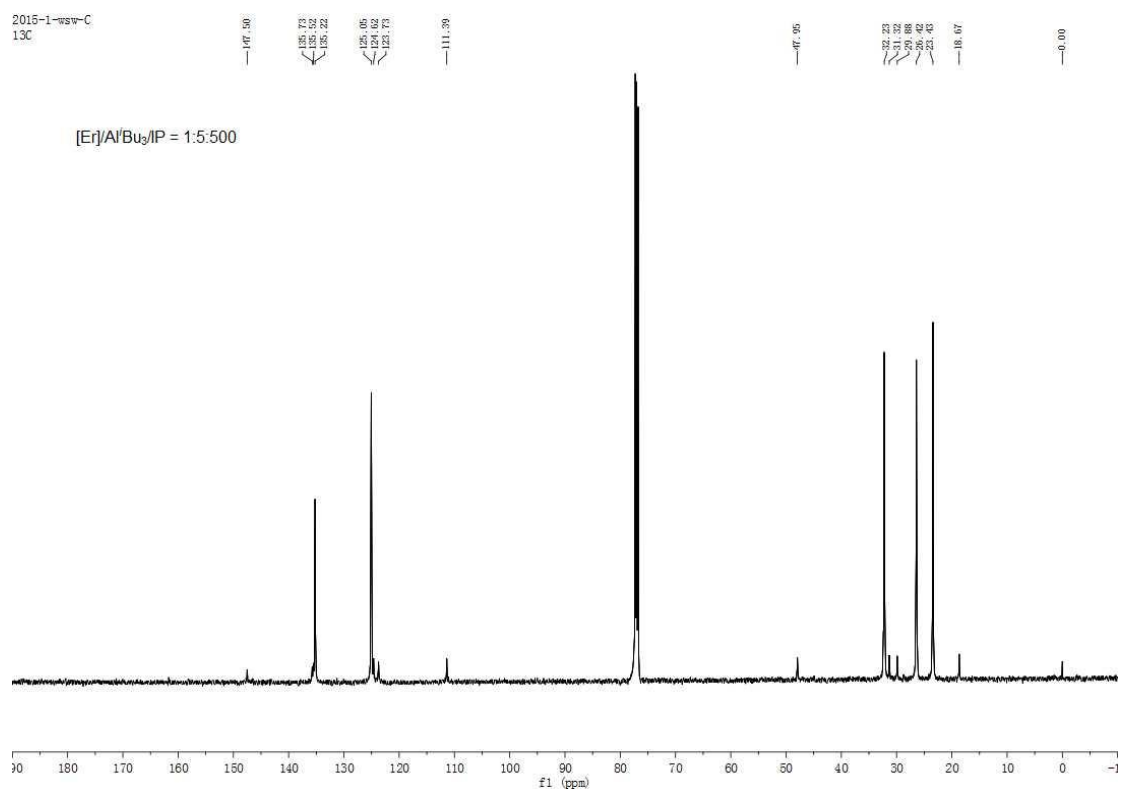

**Fig. S45.** <sup>13</sup>C NMR (126 MHz, CDCl<sub>3</sub>, 298 K) spectrum of PIP for entry 11 (Table 3). Scan 3000 times. No 1, 4-*trans*-polymer.
